# Supplementary material for: Tanshinone I attenuates fibrosis in fibrotic kidneys through down-regulation of inhibin beta-A
Source: PubMed Central journal article supplement (PMC9020026; doi:10.1186/s12906-022-03592-3), 2022-04-19

repeat1

cropped

| mk            | Tan-I |   | Tan-I |     | Tan-I |   | Tan-I |    | mk |
|---------------|-------|---|-------|-----|-------|---|-------|----|----|
| $\mu\text{M}$ | 0     | 0 | 0.5   | 0.5 | 5     | 5 | 50    | 50 |    |

Fn (ab23750)  
270kd  
R

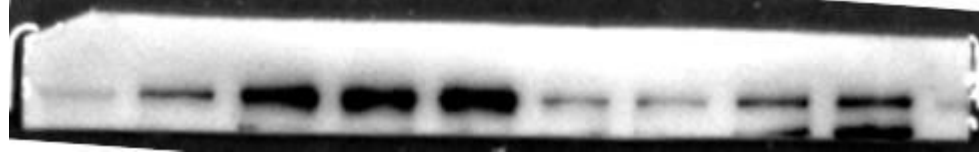

270kd

pSmad3 (ET1609-41)  
54KD  
R

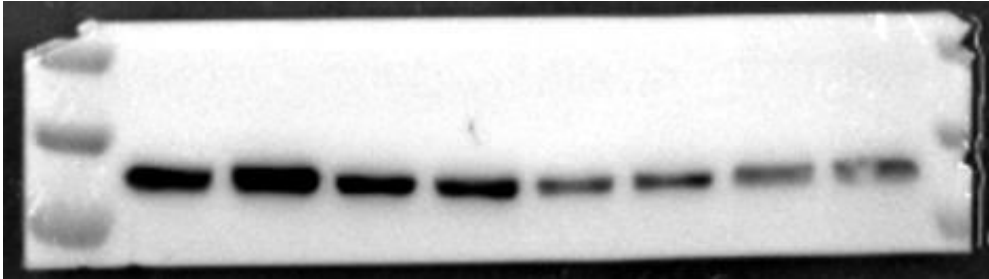

95kd

66kd

52kd

$\alpha$ -SMA (ET1607-53)  
43kd  
R

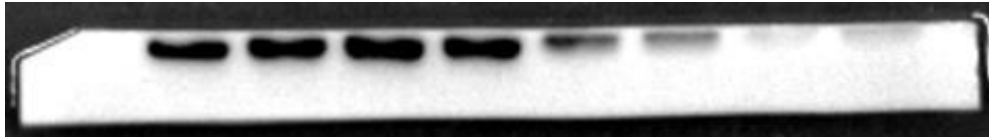

Snail (A11794)  
34KD  
R

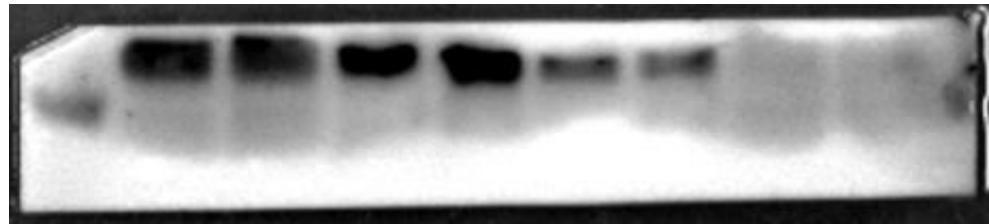

30kd

$\alpha$ -Tubulin (AF0001),  
55K  
R

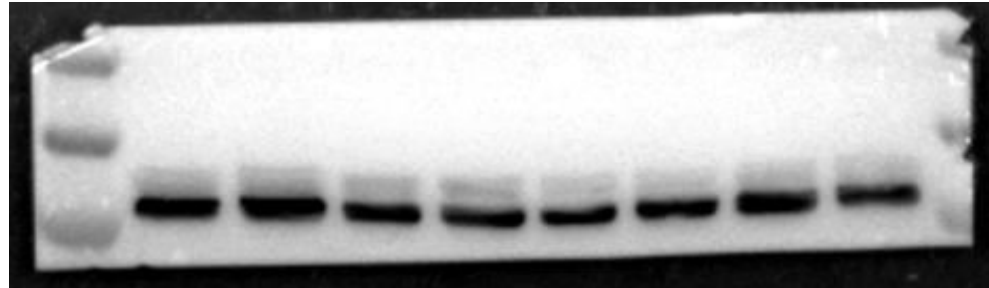

95kd

66kd

52kd

**Figure 1. Tanshinone I (Tan-I) inhibits fibrotic changes of rat renal fibroblasts**

Rat renal fibroblasts (NRK-49F) were starved for 24h and followed by 24h treatment with different concentration (0.5, 5, 50  $\mu\text{M}$ ) of Tan-I. The expression of fibronectin (FN),  $\alpha$ -smooth muscle actin ( $\alpha$ -SMA), Snail and phosphorylation of Smad3 (pSmad3) were analyzed by Western blotting and then quantified.

repeat1

Fn (ab23750)  
270kd  
R

original

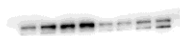

merged

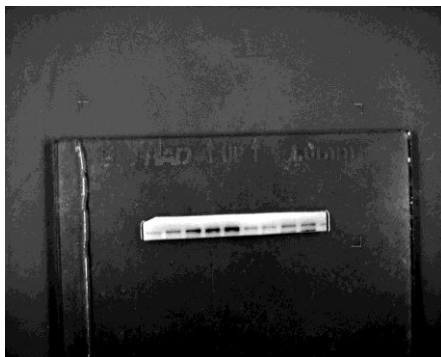

Snail (A11794)  
34KD  
R

original

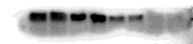

merged

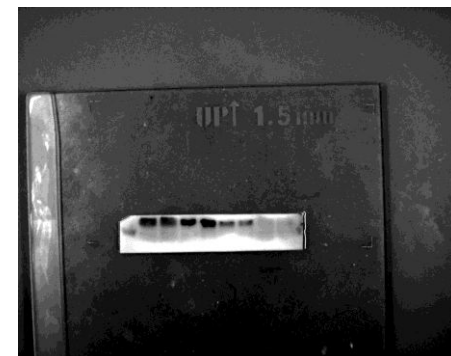

pSmad3 (ET1609-41), 54KD,  
R

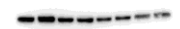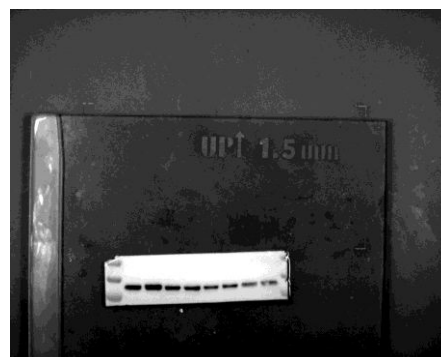

a-Tubulin (AF0001), R,  
55KD

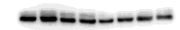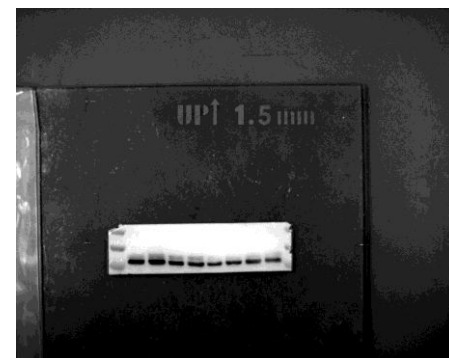

a-SMA (ET1607-53),R,43kd

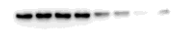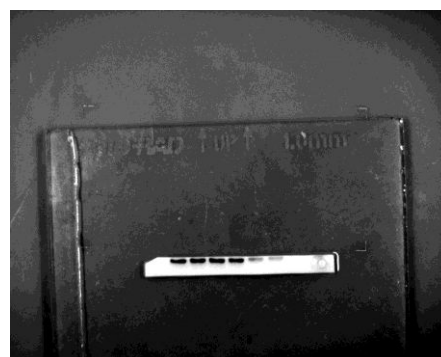

| DT1 | DT2 | DT3 | DT4 | DT5 | DT6 | DT7 | DT8 |
|-----|-----|-----|-----|-----|-----|-----|-----|
|-----|-----|-----|-----|-----|-----|-----|-----|

repeat2

cropped

Fn (ab23750)  
270kd  
R

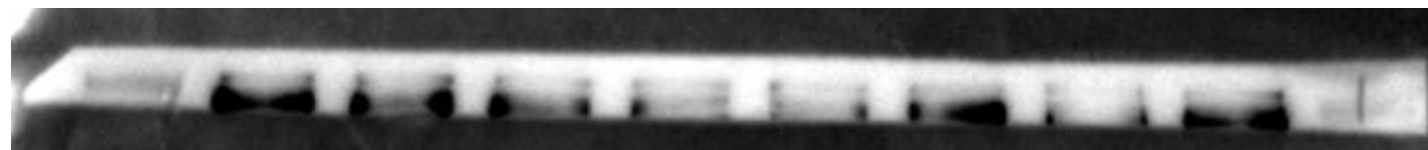

270kd

pSmad3 (ET1609-41)  
54KD  
R

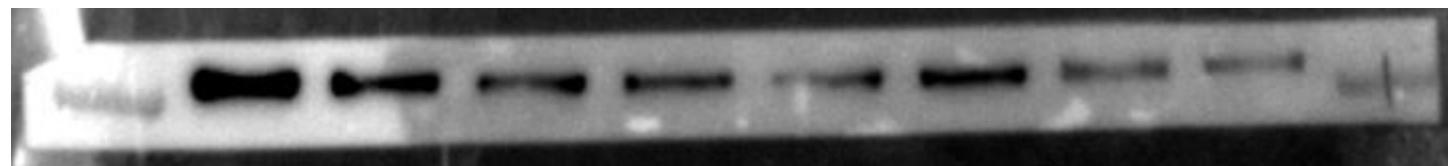

52kd

α-SMA (ET1607-53),R,43kd

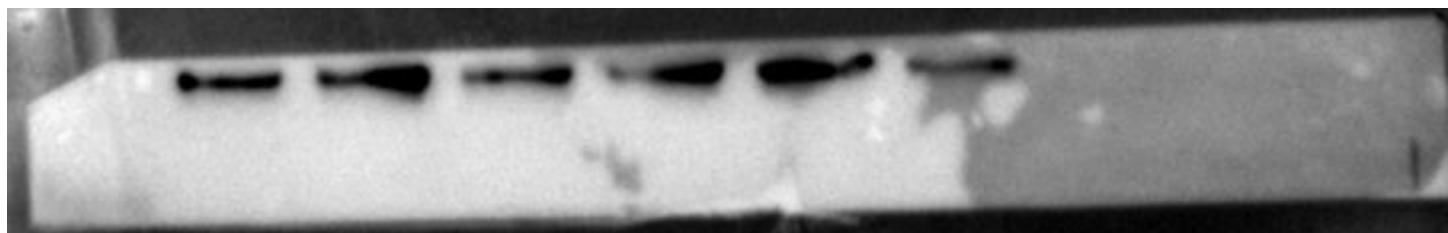

37kd

Snail (A11794)  
34KD  
R

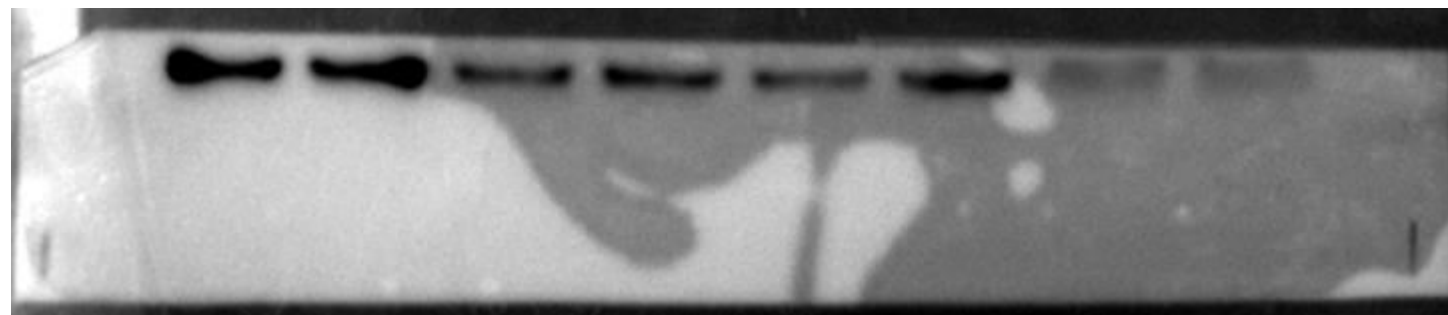

30kd

GAPDH(60001-I-IG)M,  
37KD

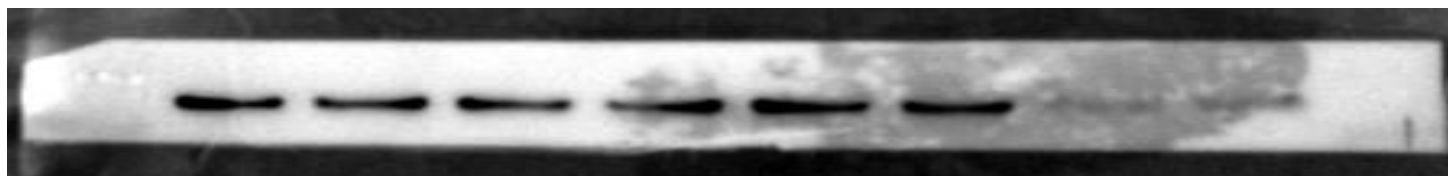

37kd

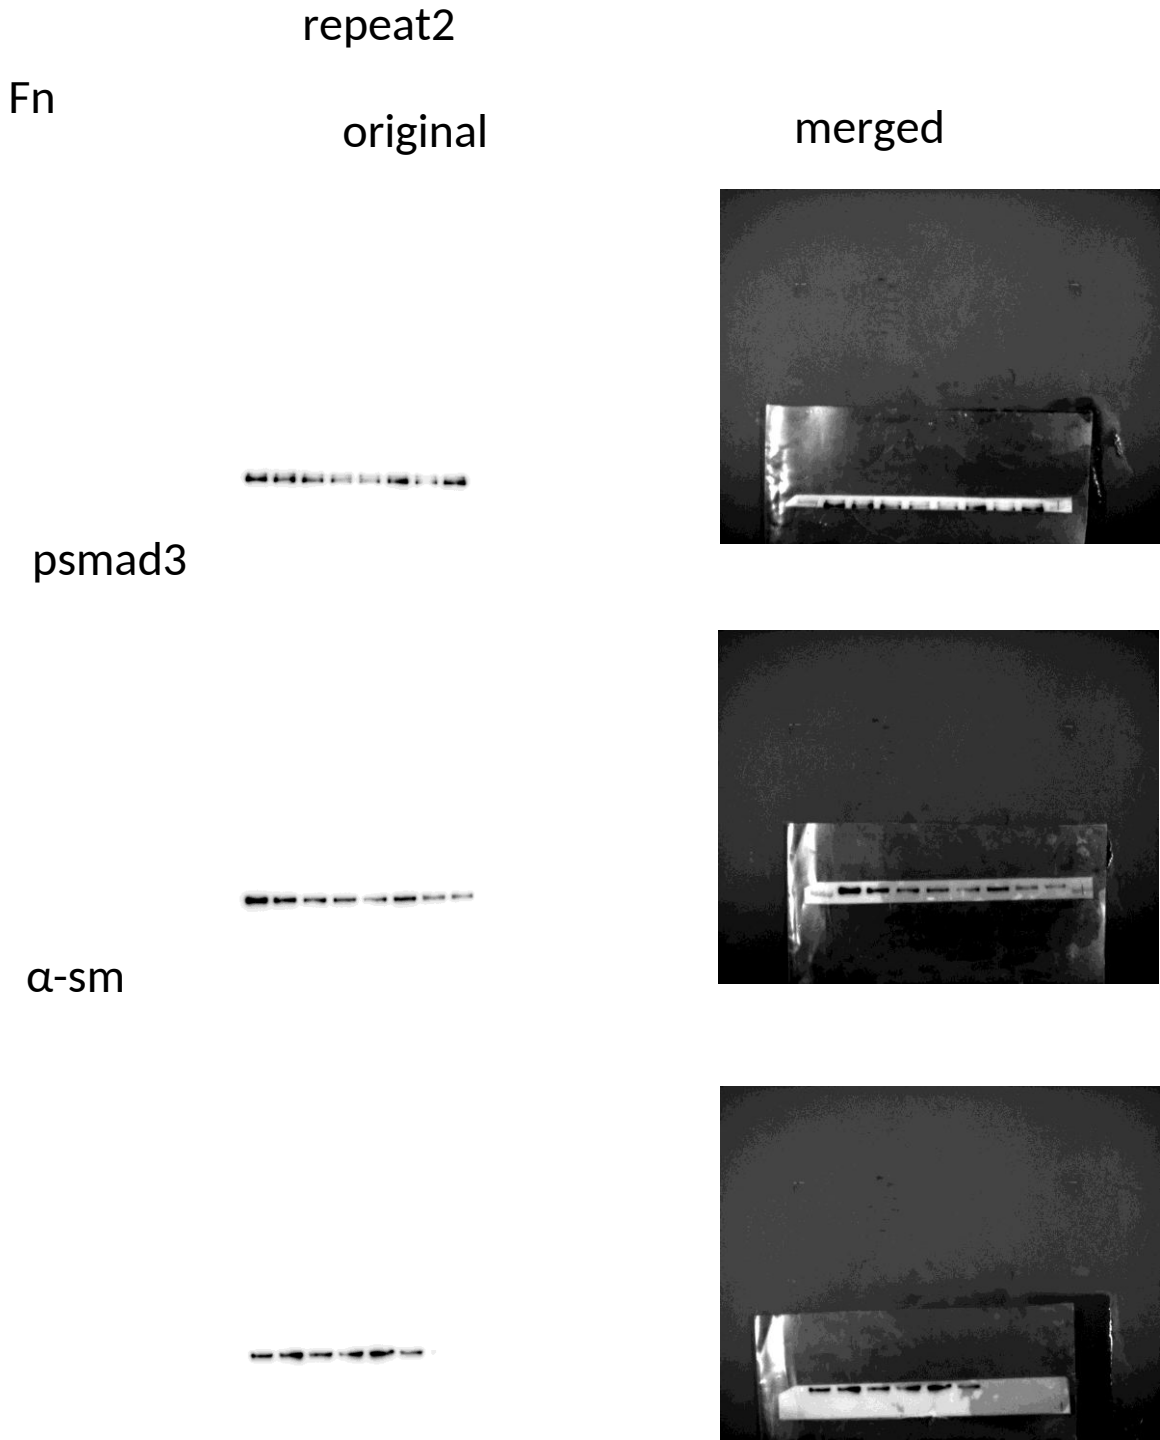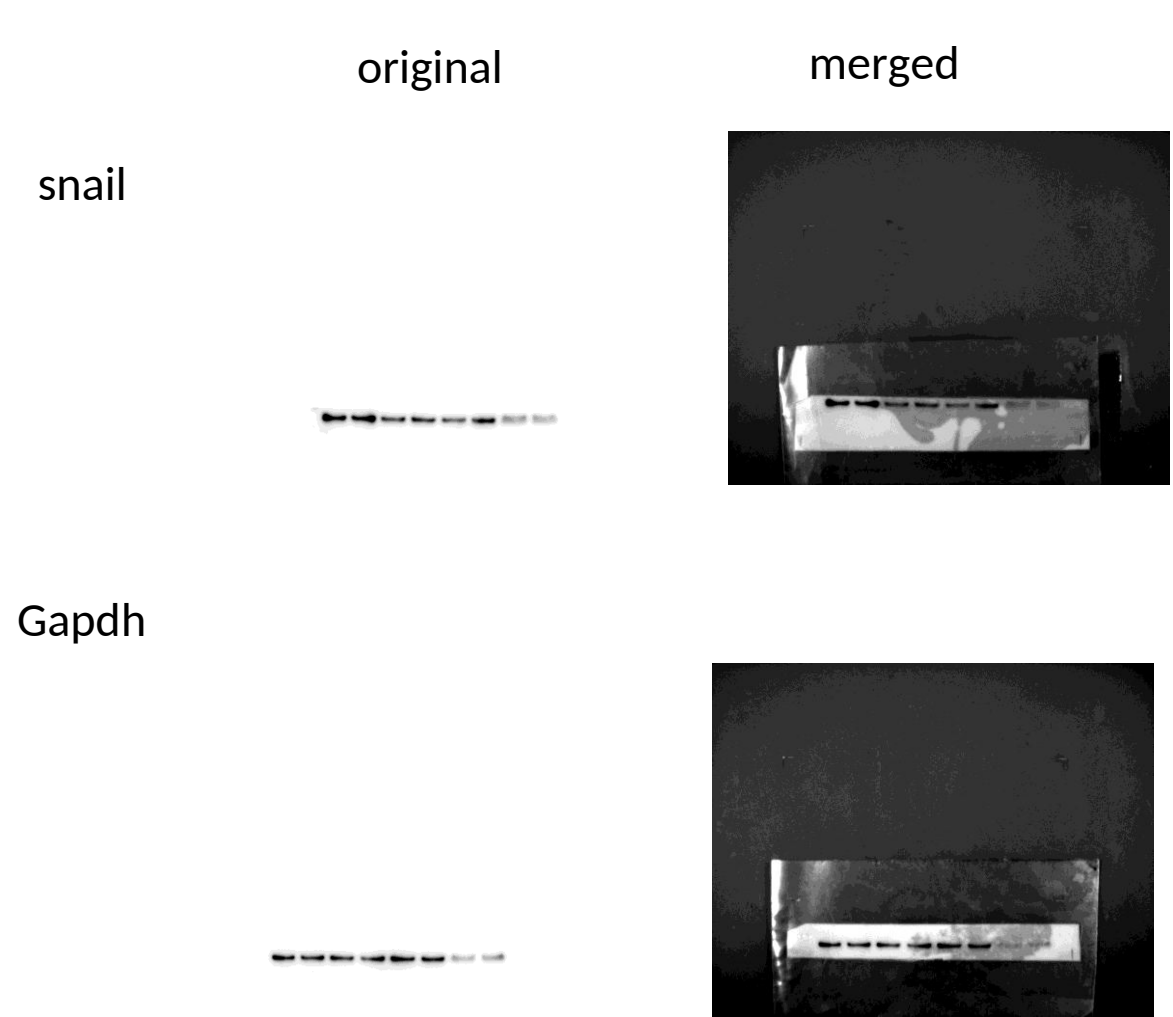

repeat3

| DT1 | DT2 | DT3 | DT4 | DT5 | DT6 | DT7 | DT8 |
|-----|-----|-----|-----|-----|-----|-----|-----|
|-----|-----|-----|-----|-----|-----|-----|-----|

cropped

Fn (ab23750)  
270kd  
R

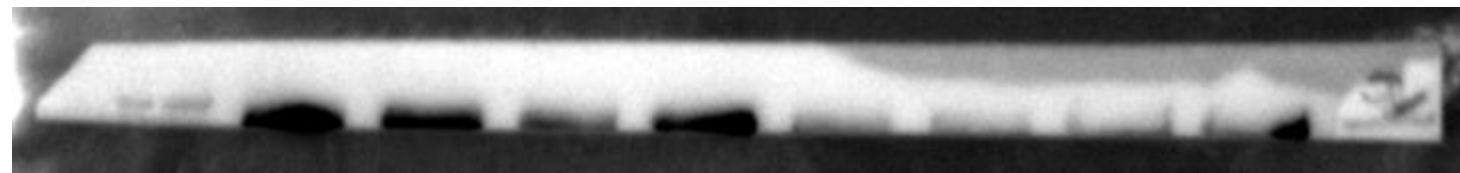

270kd

pSmad3  
(ET1609-41) 54KD R

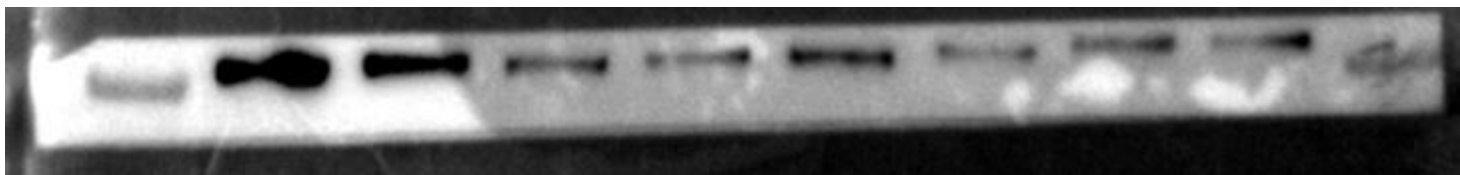

52kd

a-SMA (ET1607-53),R,43kd

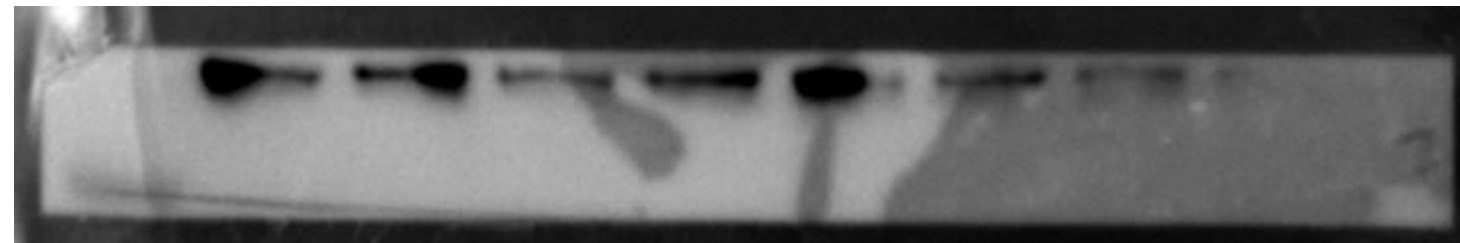

37kd

Snail (A11794)  
34KD  
R

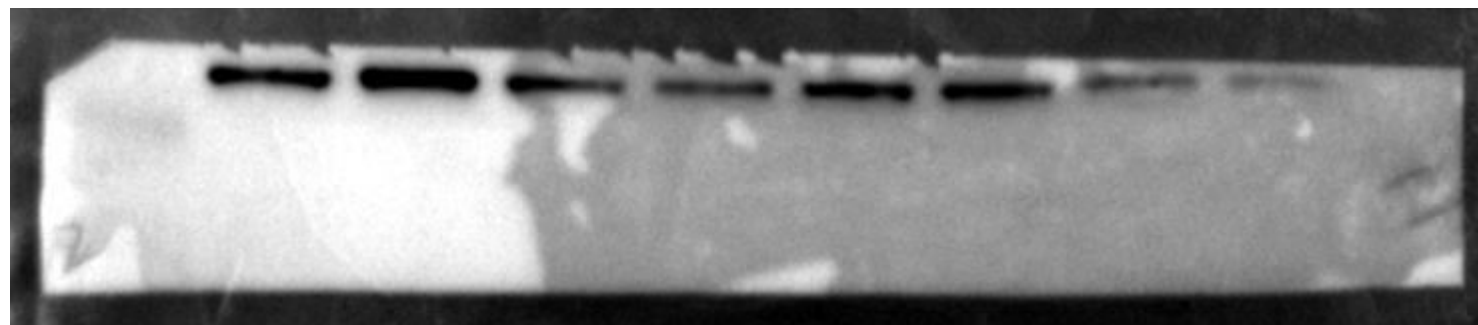

30kd

GAPDH(60001-I-IG)M,  
37KD

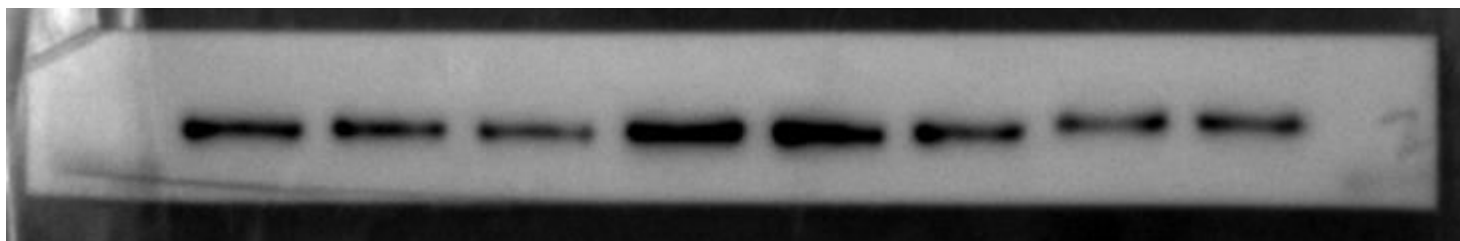

37kd

Repeat3

fn

original

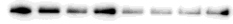

merged

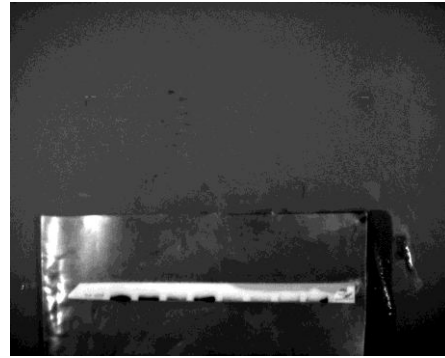

Snail

original

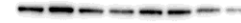

merged

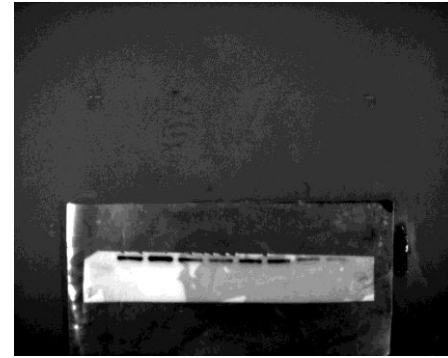

psmad3

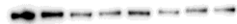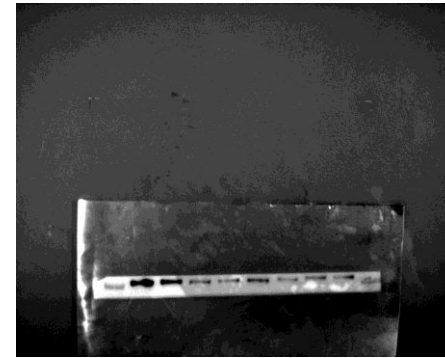

GAPDH

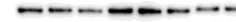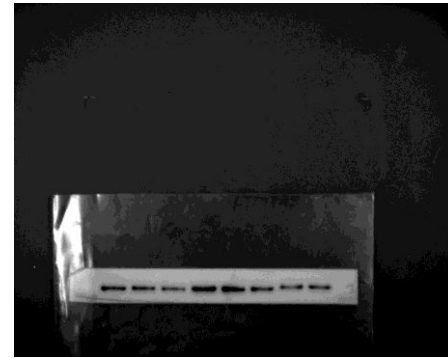

$\alpha$ -sma

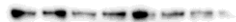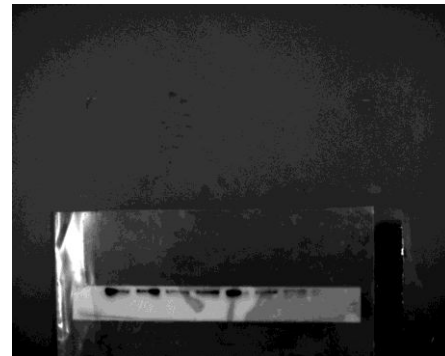

Supplement: 12906_2022_3592_MOESM1_ESM.pdf [file 12906_2022_3592_MOESM1_ESM.pdf]
