# Supplementary material for: Tanshinone I attenuates fibrosis in fibrotic kidneys through down-regulation of inhibin beta-A
Source: PubMed Central journal article supplement (PMC9020026; doi:10.1186/s12906-022-03592-3), 2022-04-19

repeat1

cropped

| sham-DMSO | sham-TAN I | UO- DMSO | UO-TAN I |
|-----------|------------|----------|----------|
|-----------|------------|----------|----------|

|              |       |   |
|--------------|-------|---|
| Fn (ab23750) | 270kd | R |
|--------------|-------|---|

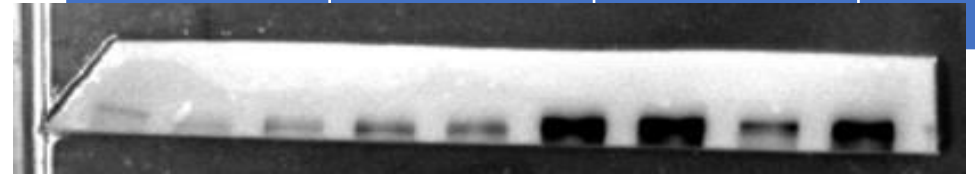

270kd

|                    |      |   |
|--------------------|------|---|
| pSmad3 (ET1609-41) | 54KD | R |
|--------------------|------|---|

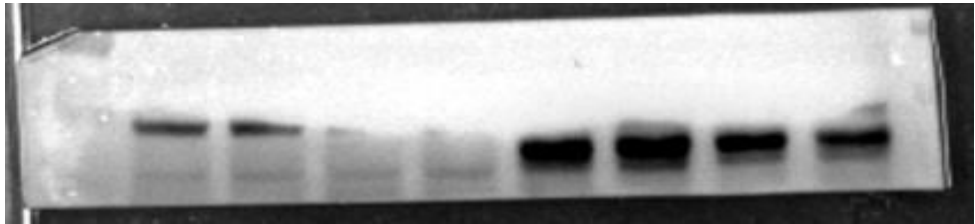

90kd  
66kd  
52kd

|                              |      |  |
|------------------------------|------|--|
| $\alpha$ -SMA (ET1607-53),R, | 43kd |  |
|------------------------------|------|--|

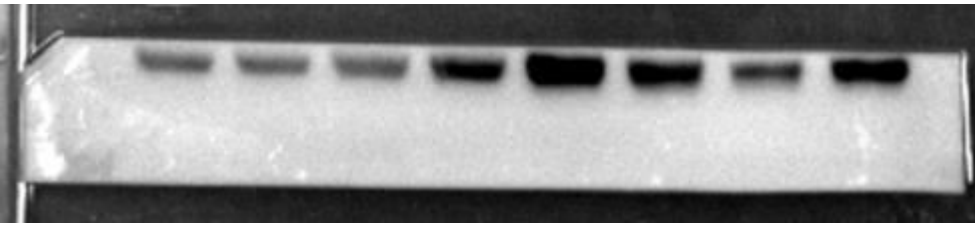

37kd

|                     |       |   |
|---------------------|-------|---|
| GAPDH (6004-1-Ig) , | 37KD, | M |
|---------------------|-------|---|

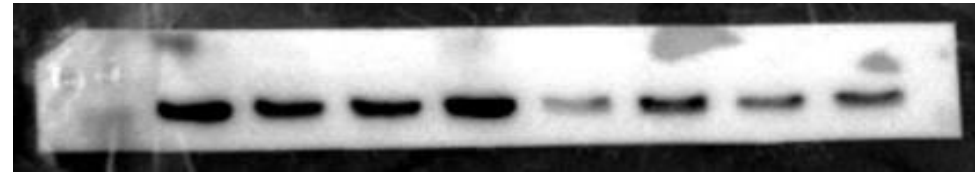

37kd

|                |      |   |
|----------------|------|---|
| Snail (A11794) | 34KD | R |
|----------------|------|---|

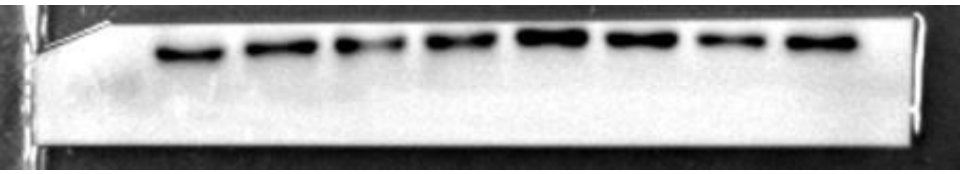

30kd

**Figure 2. Tan-I mitigates renal fibrosis in UO mice**

The expression of FN,  $\alpha$ -SMA, Snail and pSmad3 were analyzed by Western blotting and then quantified.

Fn (ab23750)  
270kd  
R

original

merged

Snail  
(A11794)

34KD

R

original

merged

repeat1

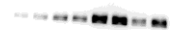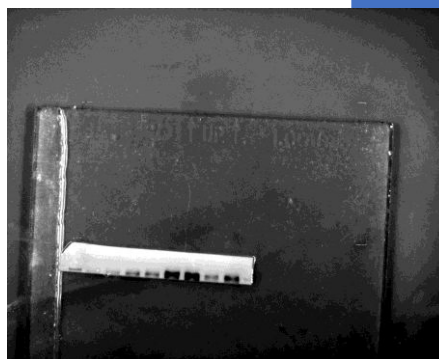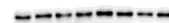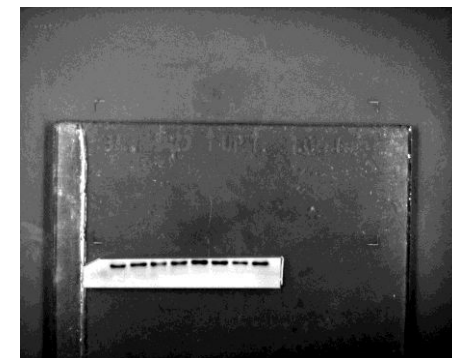

pSmad3  
(ET1609-41)

54KD

R

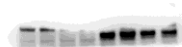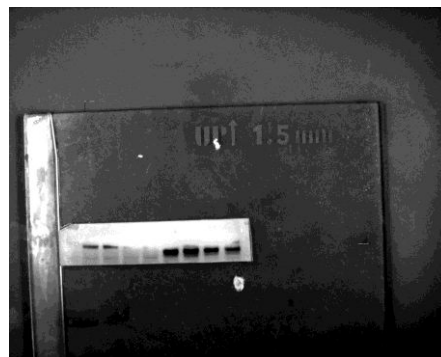

GAPDH (6004-1-Ig) ,  
37KD, M

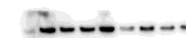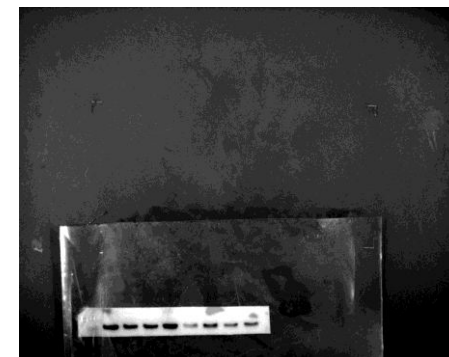

a-SMA (ET1607-53),R,43kd

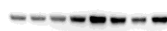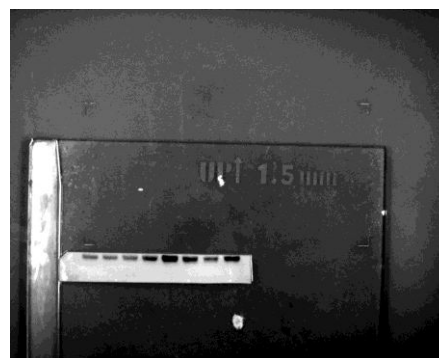

sham-DMSO    sham-TAN I    UUO- DMSO    UUO-TAN I

repeat2

cropped

Fn (ab23750)  
270kd  
R

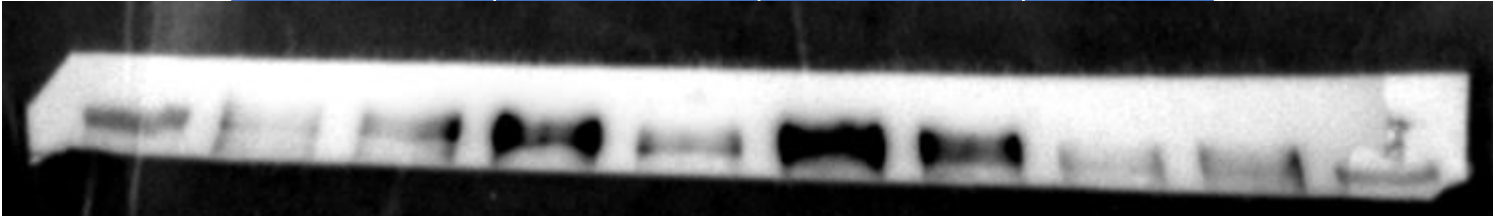

270kd

pSmad3 (ET1609-41)  
54KD  
R

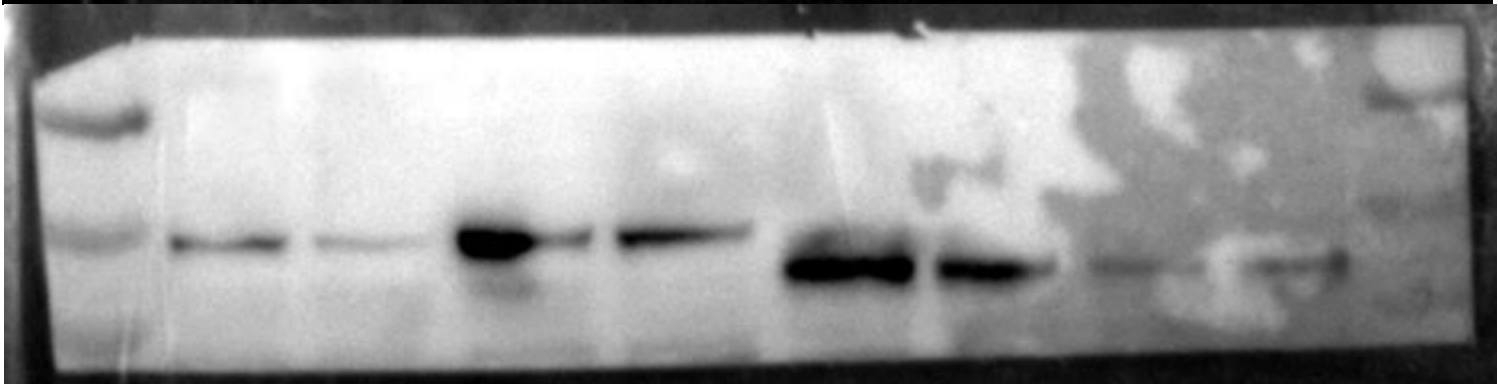

90kd

66kd

52kd

a-SMA (ET1607-53),R,43kd

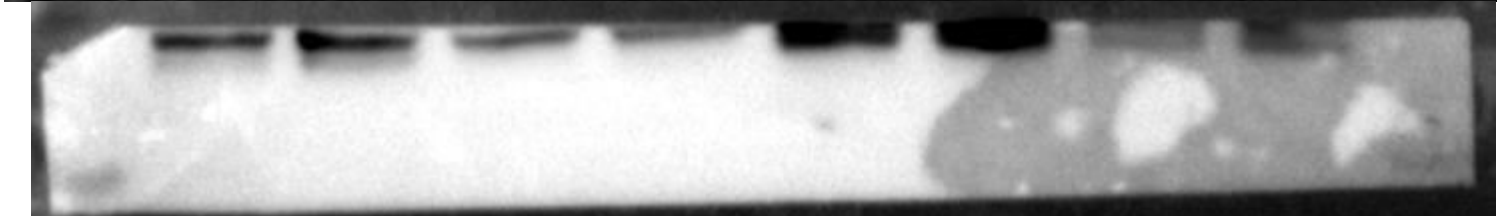

37kd

Snail (A11794)  
34KD  
R

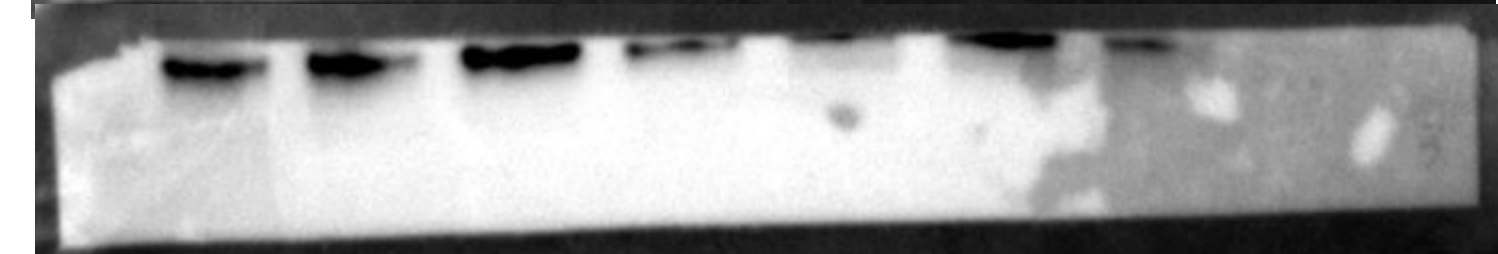

30kd

a-Tubulin (AF0001), R,  
55KD

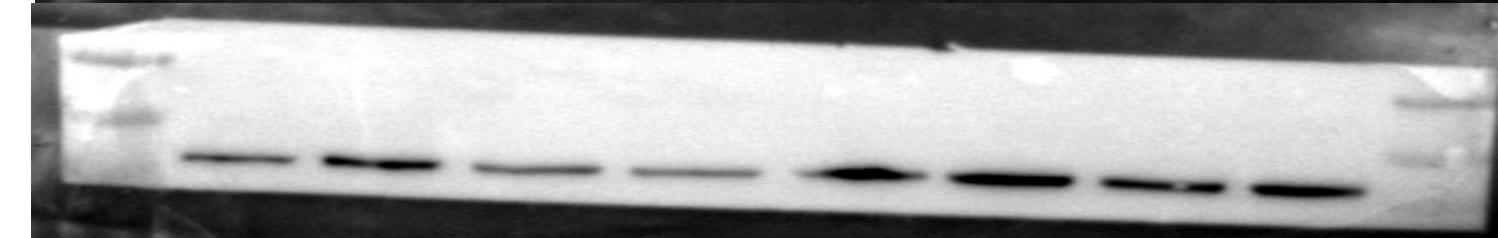

90kd

66kd

52kd

Fn (ab23750)  
270kd  
R

original

merged

Snail (A11794)  
34KD  
R

original

merged

repeat2

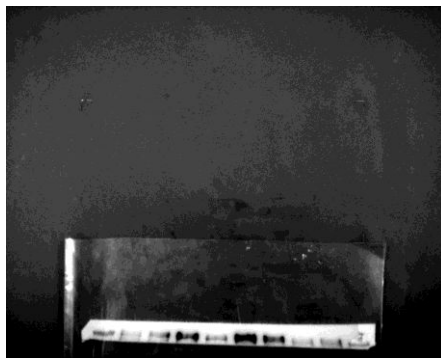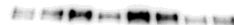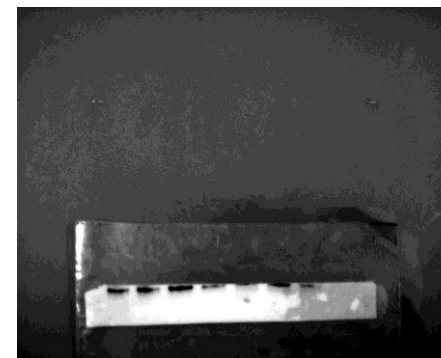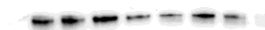

pSmad3 (ET1609-41)  
54KD  
R

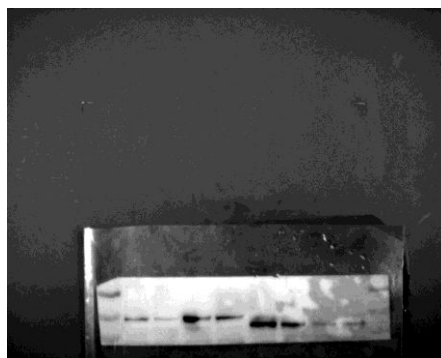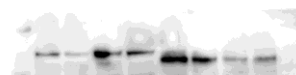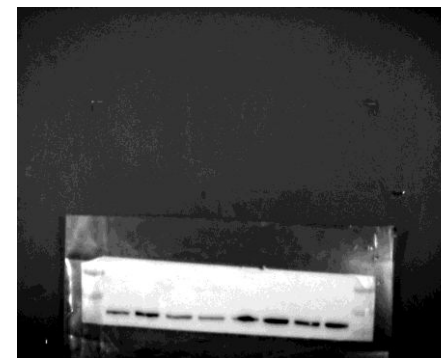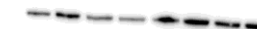

a-SMA (ET1607-53),R,43kd

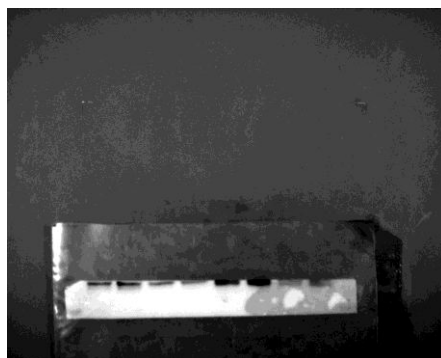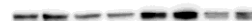

repeat3

cropped

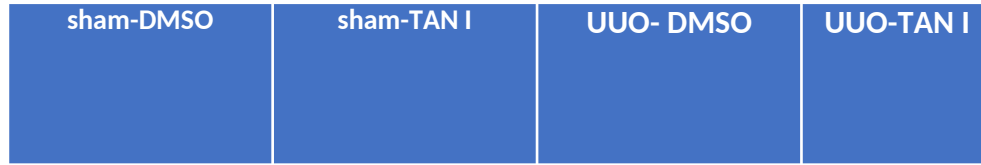

Fn (ab23750)  
270kd  
R

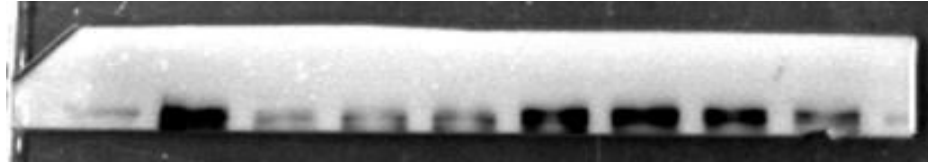

270kd

pSmad3 (ET1609-41)  
54KD  
R

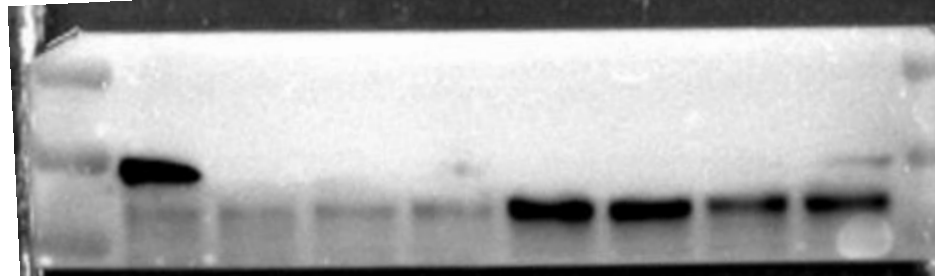

90kd

66kd

52kd

α-SMA (ET1607-53),R,43kd

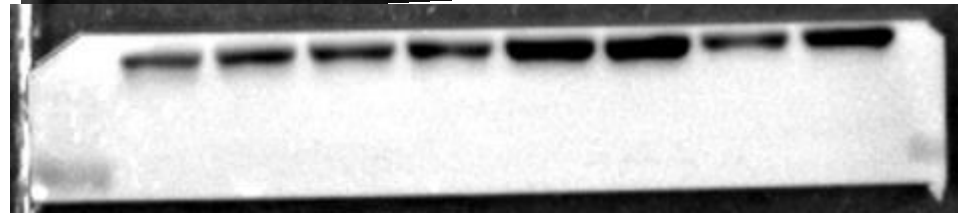

37kd

GAPDH (6004-1-Ig) ,  
37KD, M

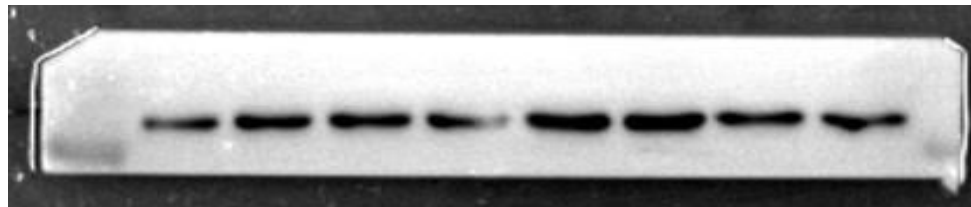

37kd

|                   |      |   |
|-------------------|------|---|
| Snail<br>(A11794) | 34KD | R |
|-------------------|------|---|

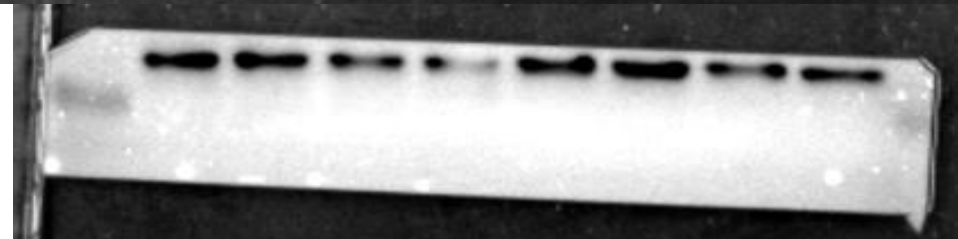

30kd



Fn (ab23750)  
270kd  
R

original

merged

Snail  
(A11794)

34KD

R

original

merged

repeat3

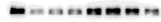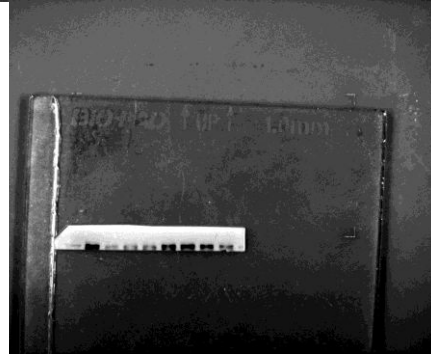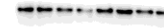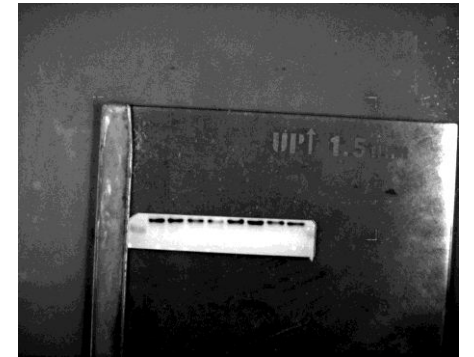

pSmad3 (ET1609-41)  
54KD

R

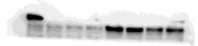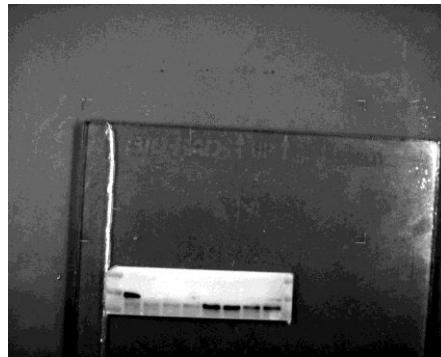

GAPDH (6004-1-Ig),  
37KD, M

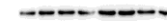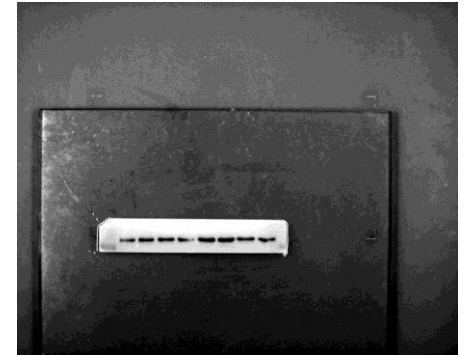

a-SMA (ET1607-53),R,43kd

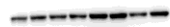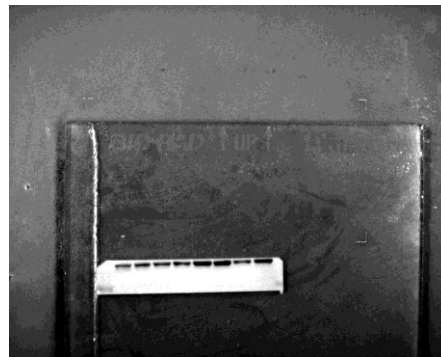

Supplement: 12906_2022_3592_MOESM2_ESM.pdf [file 12906_2022_3592_MOESM2_ESM.pdf]
