# Supplementary material for: Tanshinone I attenuates fibrosis in fibrotic kidneys through down-regulation of inhibin beta-A
Source: PubMed Central journal article supplement (PMC9020026; doi:10.1186/s12906-022-03592-3), 2022-04-19

**Figure 3. Tan-I ameliorates renal fibrosis in AAN mice**

The expression of FN,  $\alpha$ -SMA, Snail1 and pSmad3 were analyzed by Western blotting and then quantified.

| mk | Vehicle |     |     | AAN |     |     |     |     | AAN   |       |       |       |       | mk |
|----|---------|-----|-----|-----|-----|-----|-----|-----|-------|-------|-------|-------|-------|----|
|    | DMS     | DMS | DMS | DMS | DMS | DMS | DMS | DMS | Tan-I | Tan-I | Tan-I | Tan-I | Tan-I |    |
|    | O       | O   | O   | O   | O   | O   | O   | O   | I     | I     | I     | I     | I     |    |

repeat1

cropped

Fn (ab23750)  
270kd  
R

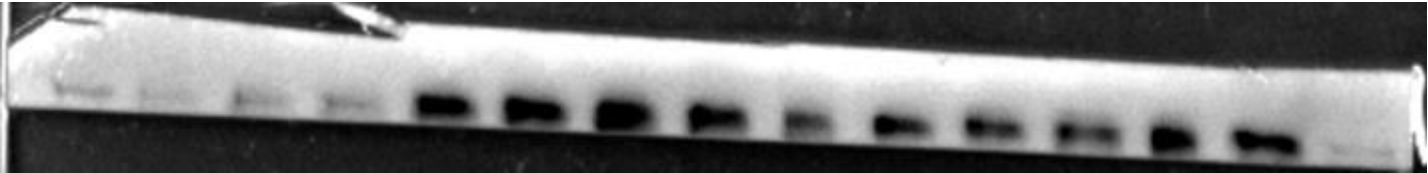

270kd

pSmad3 (ET1609-41)  
54KD  
R

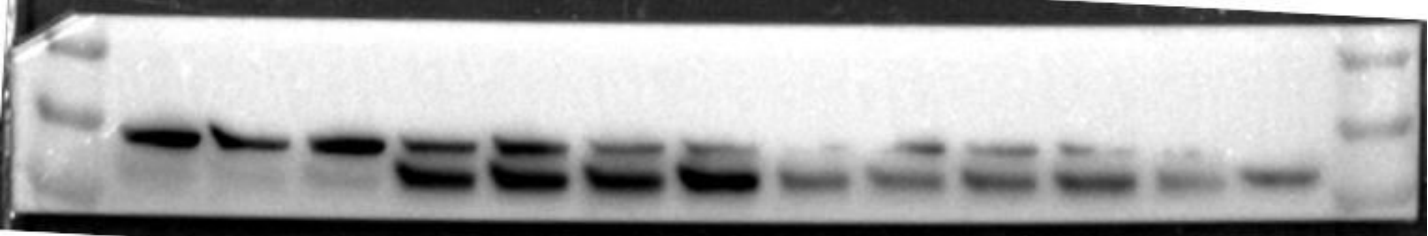

95kd

66kd

52kd

$\alpha$ -SMA(ET1607-53)  
43kd  
R

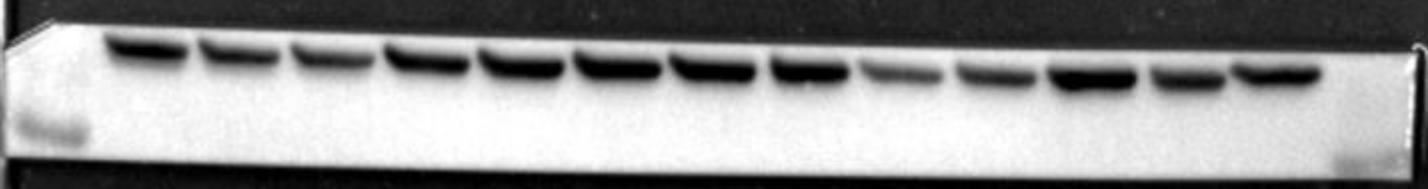

37kd

GAPDH (6004-1-Ig)  
37KD  
M

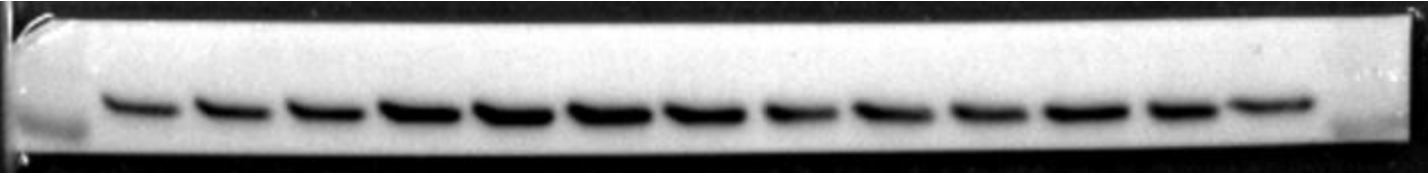

37kd

Snail (A11794)  
34KD  
R

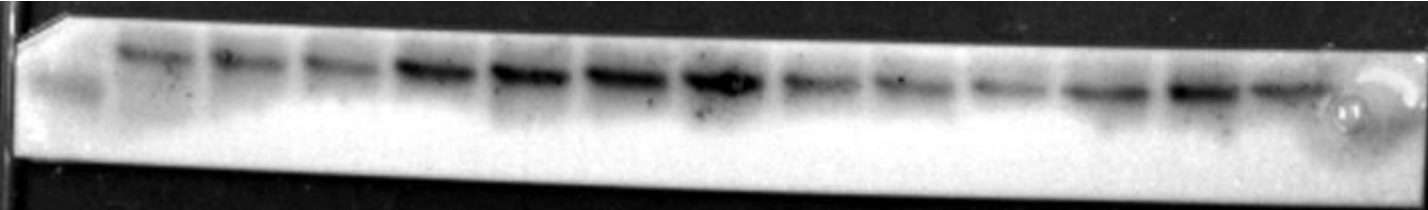

30kd

Fn (ab23750)  
270kd  
R

original

merged

Snail  
(A11794)

34KD

R

original

merged

repeat1

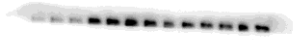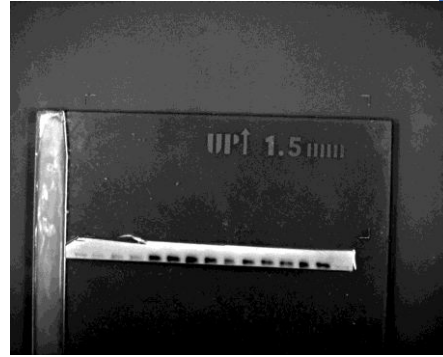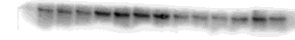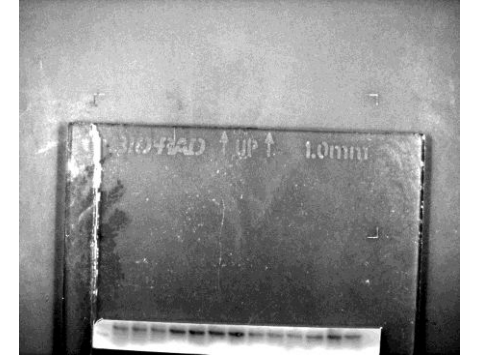

pSmad3  
(ET1609-41)

54KD

R

GAPDH (6004-1-Ig)  
37KD  
M

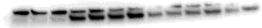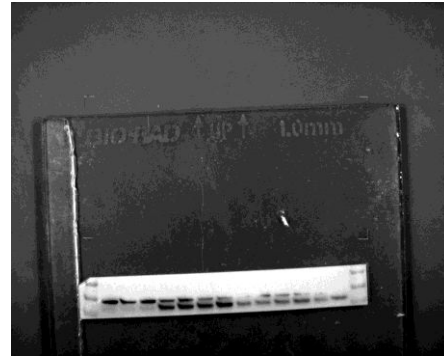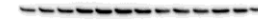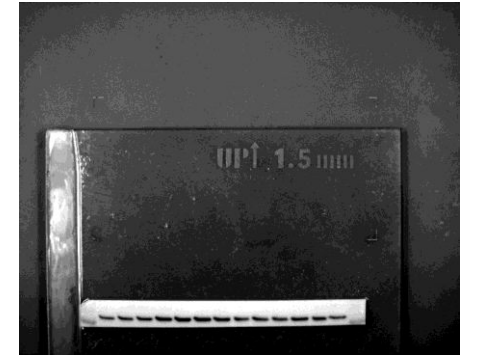

α-SMA (ET1607-53),R,43kd

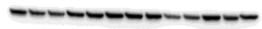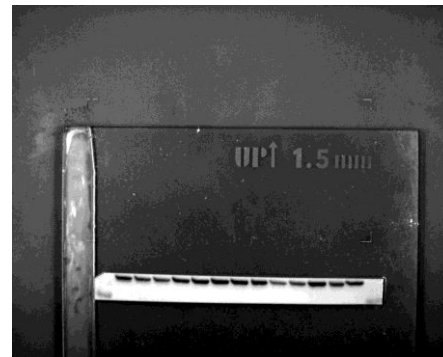

repeat2

| Mk | Ns-dms | Ns-dms | Ns-dms | Aan-dms | Aan-dms | Aan-dms | Aan-dms | Aan-dms | Aan-Tan- | Aan-Tan- | Aan-Tan- | Aan-Tan- | Aan-Tan- | mk |
|----|--------|--------|--------|---------|---------|---------|---------|---------|----------|----------|----------|----------|----------|----|
|    | o      | o      | o      | o       | o       | o       | o       | o       |          |          |          |          |          |    |

cropped

Fn (ab23750)  
270kd  
R

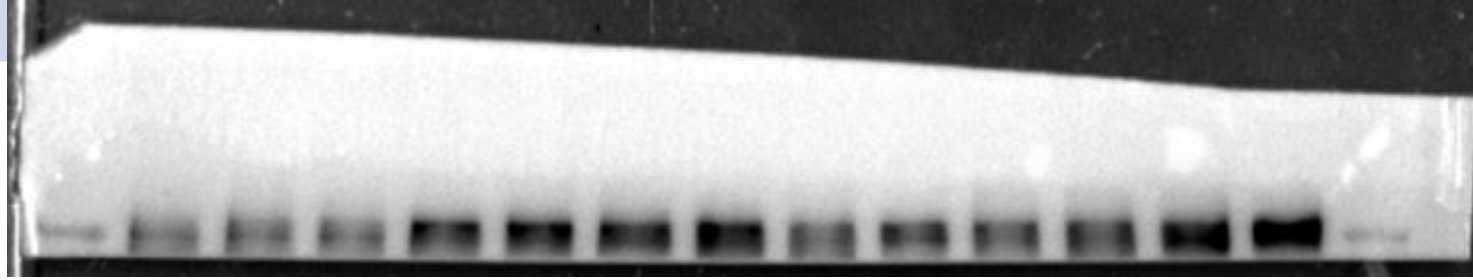

270kd

pSmad3  
(ET1609-41)

54KD

R

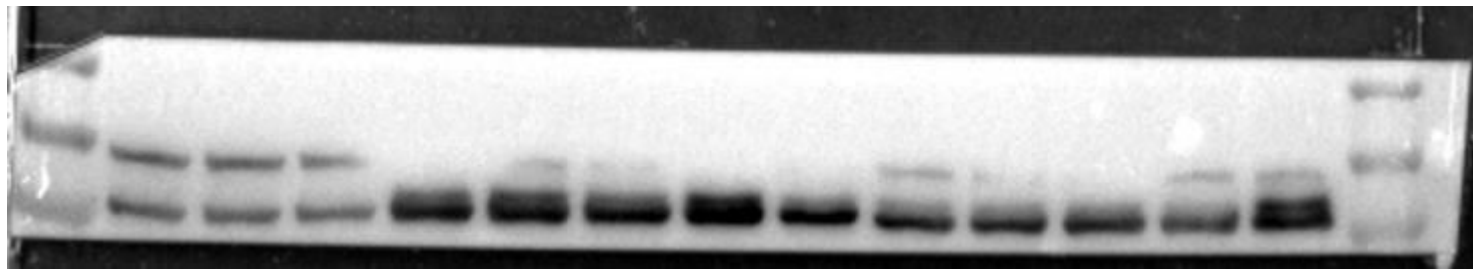

90kd

66kd

52kd

a-SMA (ET1607-53),R,43kd

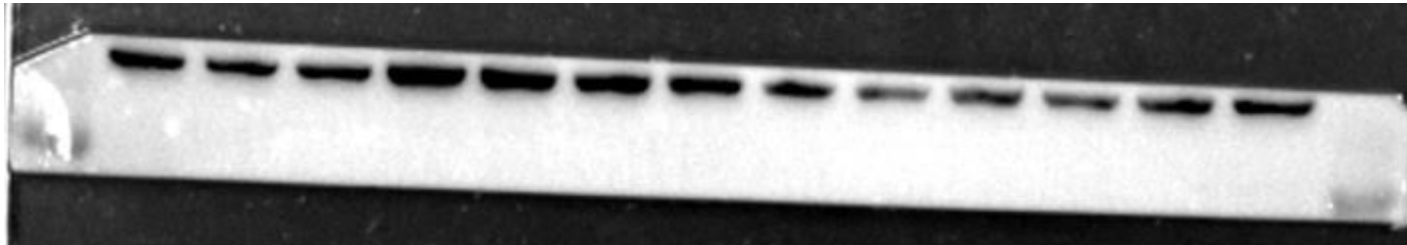

37kd

GAPDH (6004-1-Ig)  
37KD  
M

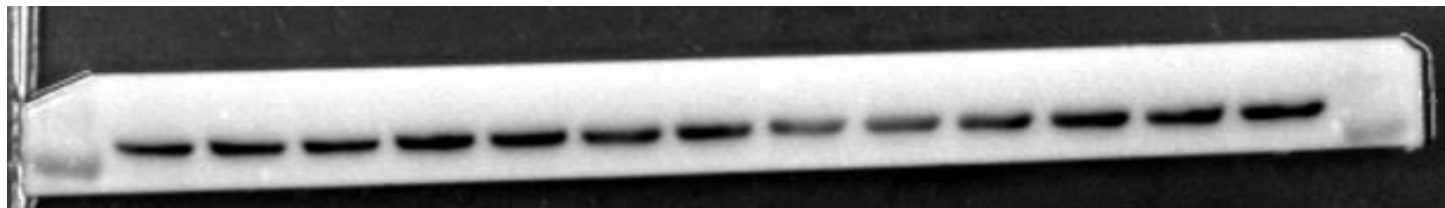

37kd

Snail  
(A11794)

34KD

R

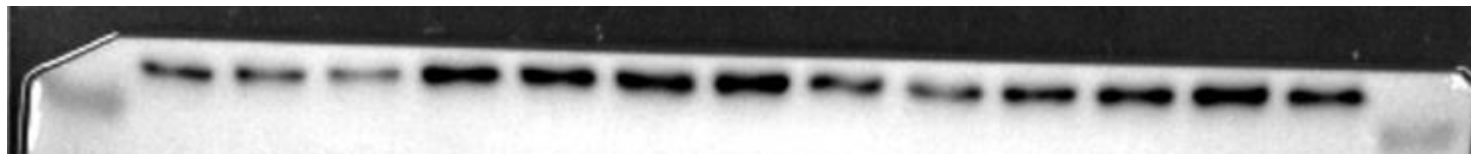

30kd

Fn (ab23750)  
270kd  
R

original

merged

Snail  
(A11794)

34KD

R

original

merged

repeat2

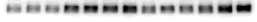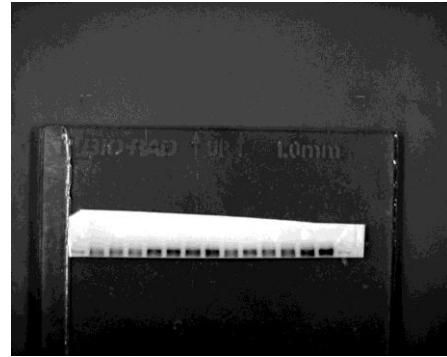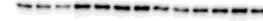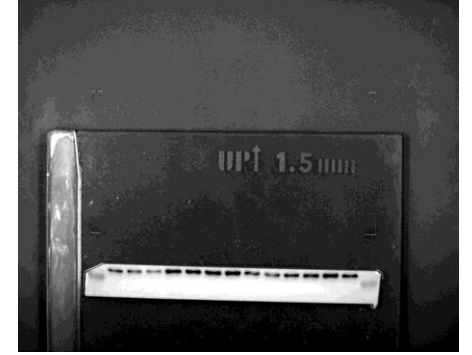

pSmad3  
(ET1609-41)

54KD

R

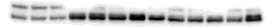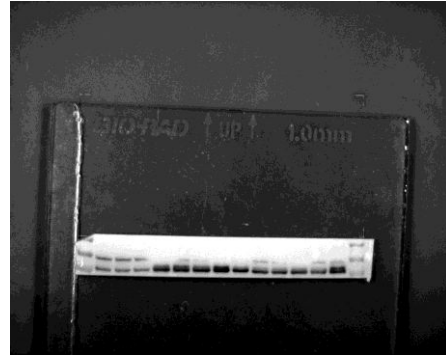

GAPDH (6004-1-Ig)  
37KD  
M

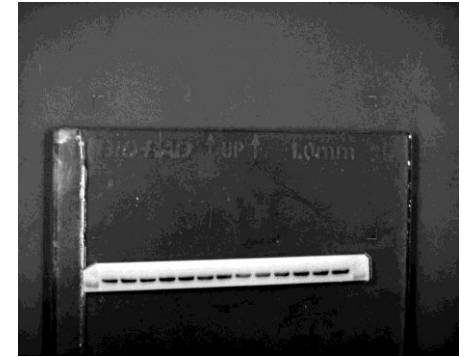

a-SMA (ET1607-53),R,43kd

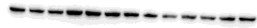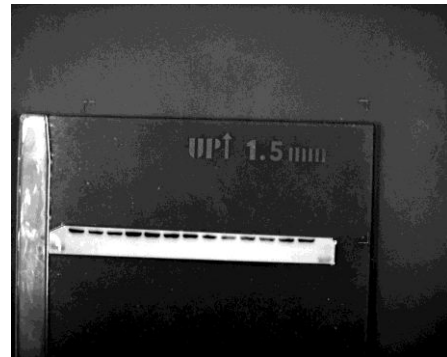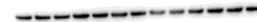

repeat3

Mk

Ns-  
dms

Ns-  
dms

Ns-  
dms

Aan-  
dms

Aan-  
dms

Aan-  
dms

Aan-  
dms

Aan-  
dms

Aan-  
Tan-  
I

mk

o

o

o

o

o

o

o

o

I

I

I

I

I

I

cropped

Fn (ab23750)  
270kd  
R

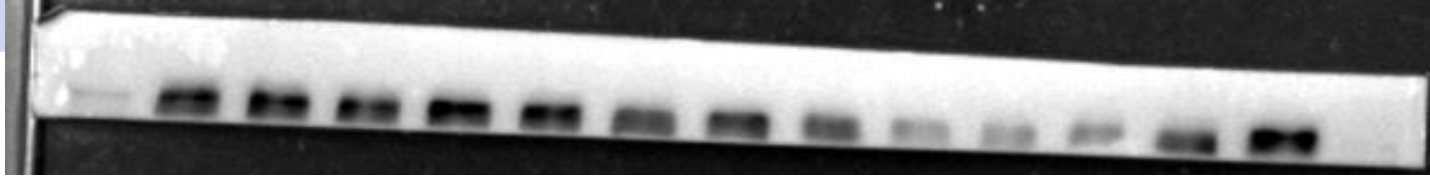

270kd

pSmad3  
(ET1609-41) 54KD R

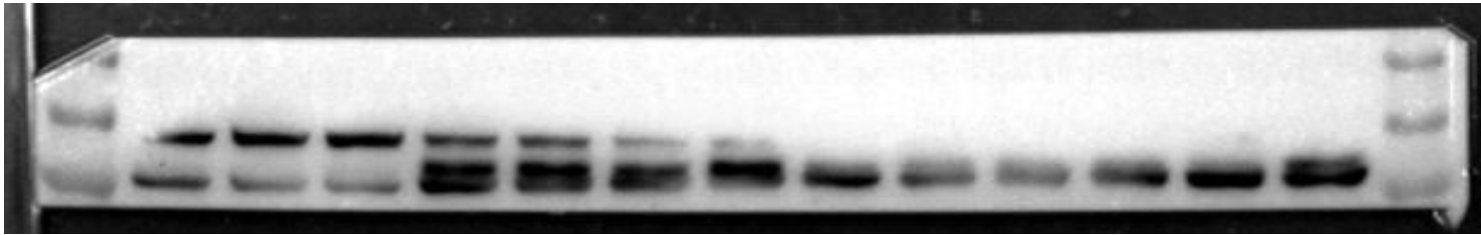

90kd

66kd

52kd

a-SMA (ET1607-53),R,43kd

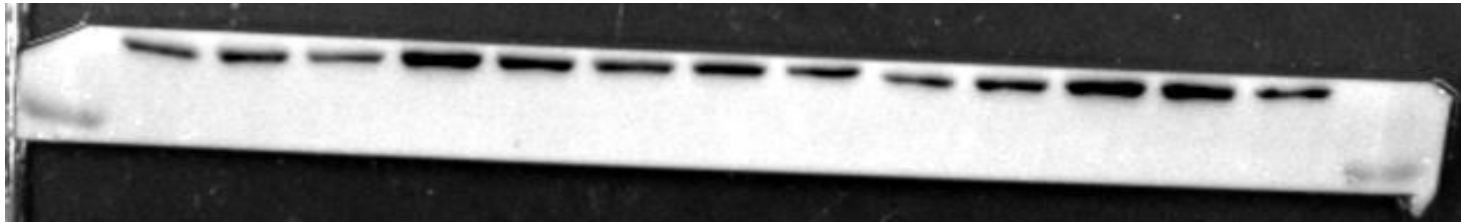

37kd

GAPDH (6004-1-Ig)  
37KD  
M

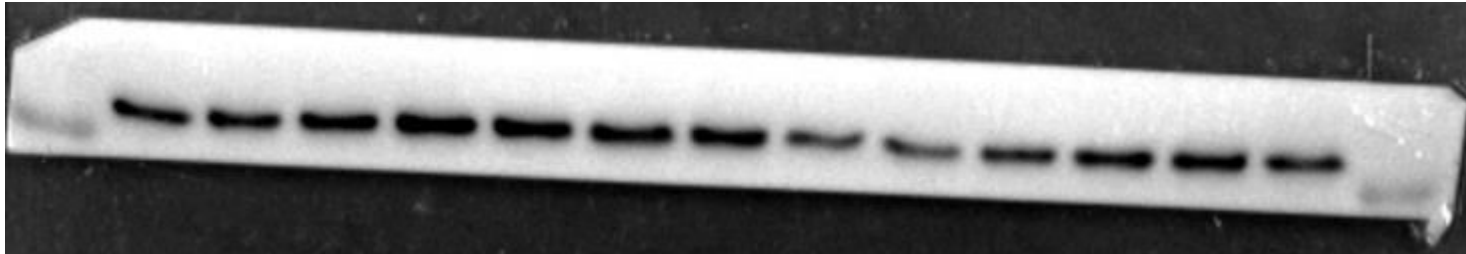

37kd

Snail  
(A11794) 34KD R

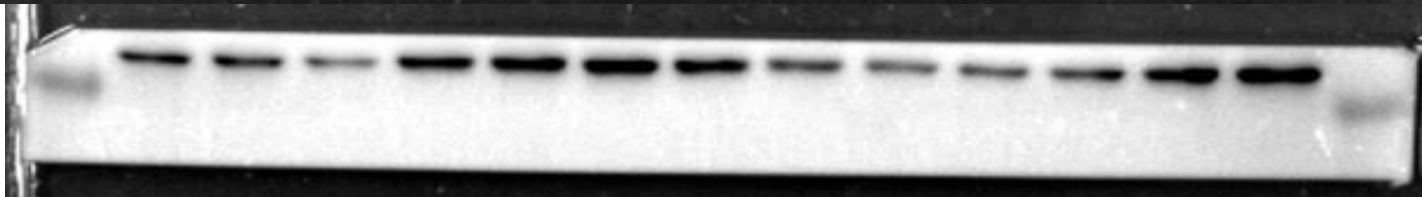

30kd



Fn (ab23750)  
270kd  
R

original

repeat3

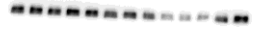

pSmad3  
(ET1609-41) 54KD R

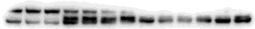

a-SMA (ET1607-53),R,43kd

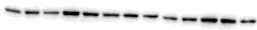

merged

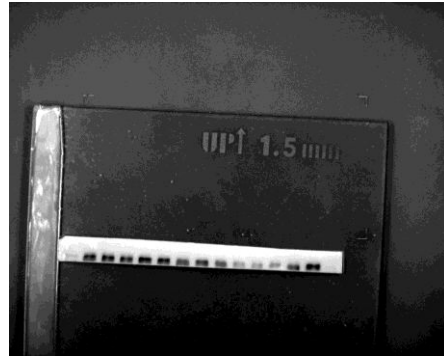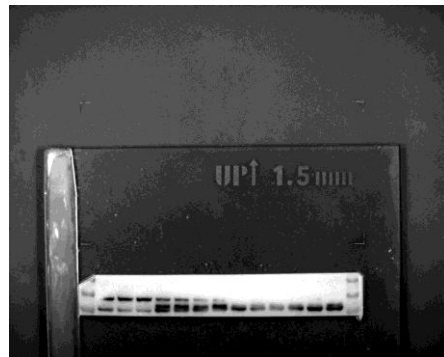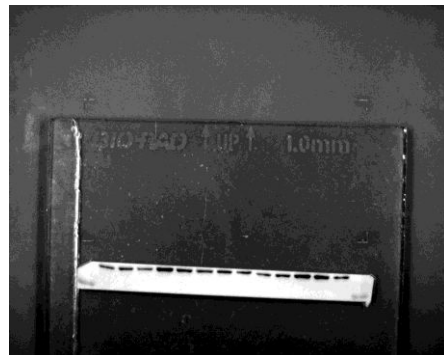

Snail  
(A11794) 34KD R

GAPDH (6004-1-Ig)  
37KD  
M

original

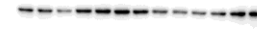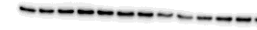

merged

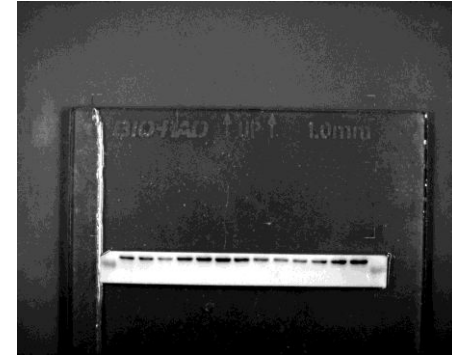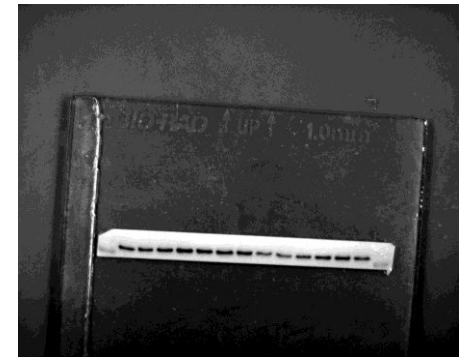

Supplement: 12906_2022_3592_MOESM3_ESM.pdf [file 12906_2022_3592_MOESM3_ESM.pdf]
