# Supplementary material for: Tanshinone I attenuates fibrosis in fibrotic kidneys through down-regulation of inhibin beta-A
Source: PubMed Central journal article supplement (PMC9020026; doi:10.1186/s12906-022-03592-3), 2022-04-19

| DMSO |     |     | TAN I-L |     |     | TAN I-M |     |     | TAN I-H |      |      |
|------|-----|-----|---------|-----|-----|---------|-----|-----|---------|------|------|
| DT1  | DT2 | DT3 | DT4     | DT5 | DT6 | DT7     | DT8 | DT9 | DT10    | DT11 | DT12 |

NRK-49F cells were starved for 24h and followed by 24h treatment with different concentration (0.5, 5, 50  $\mu$ M) of Tan-I. The expression of inhibin beta-A (INHBA) was analyzed by Western blotting and then quantified.

INHBA(ER1911-46)  
45KD  
R

repeat1  
cropped

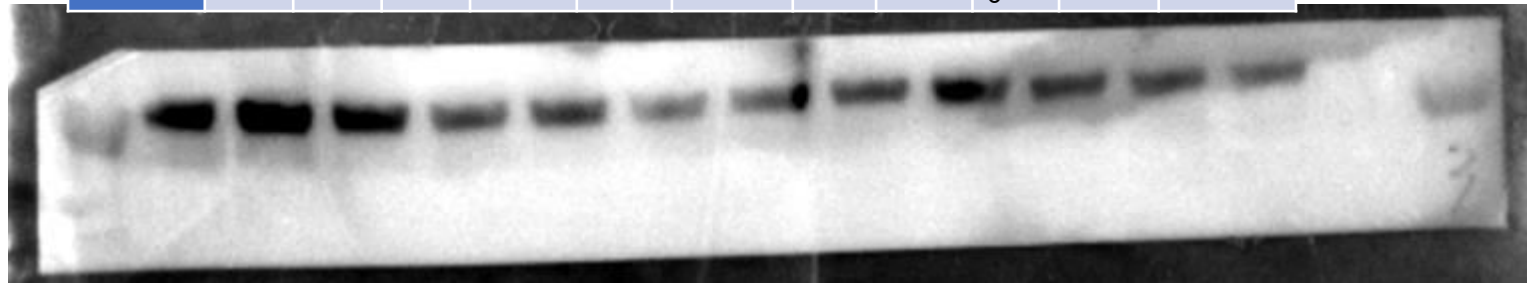

52kd

$\alpha$ -Tubulin (AF0001), R,  
55KD

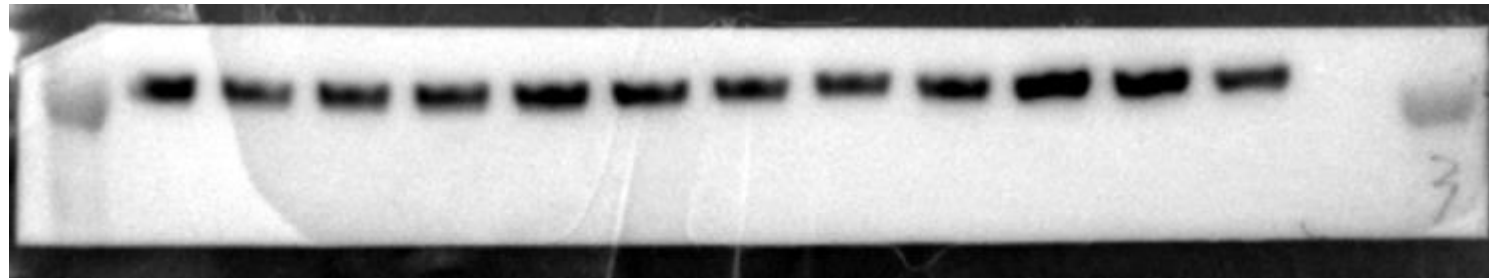

52kd

INHBA(ER1911-46)  
45KD  
R

repeat2

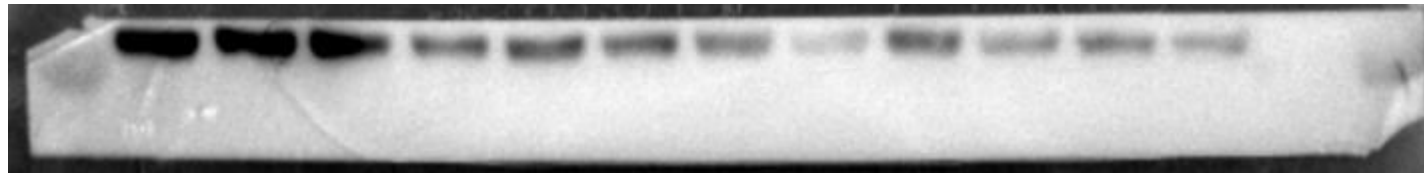

52kd

$\alpha$ -Tubulin (AF0001), R,  
55KD

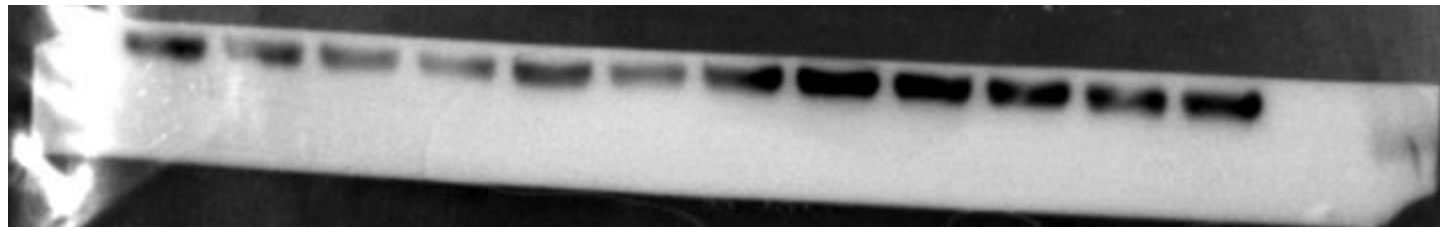

52kd

INHBA(ER1911-46)  
45KD  
R

repeat3

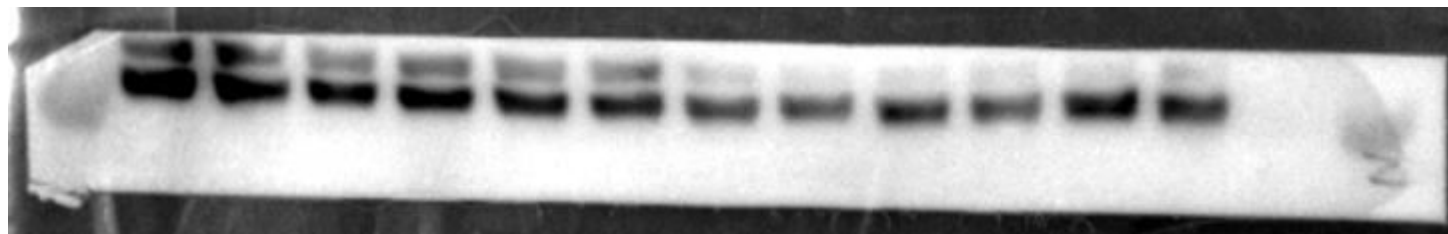

52kd

$\alpha$ -Tubulin (AF0001), R,  
55KD

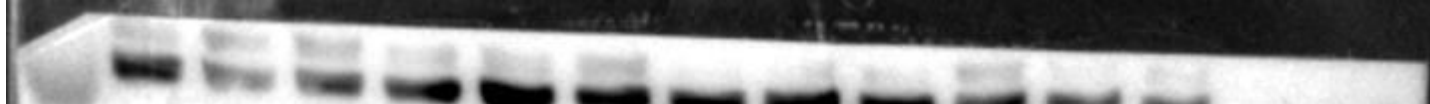

original

merged

a-Tubulin (AF0001),  
R, 55KD

original

merged

INHBA(ER1911-46)  
45KD  
R

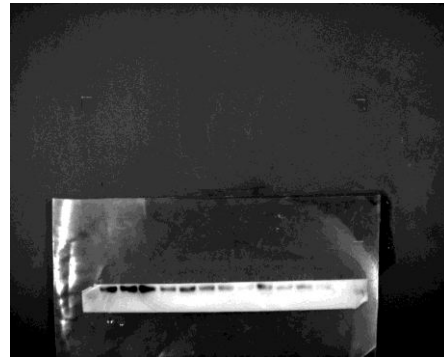

repeat1

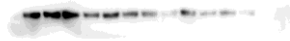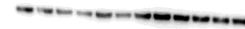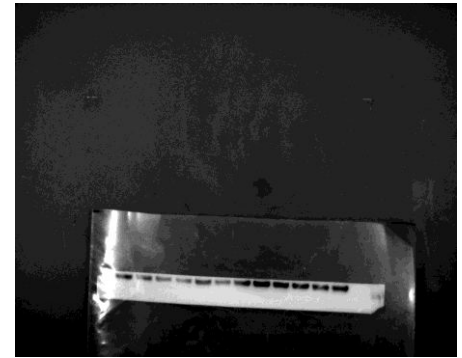

INHBA(ER1911-46)  
45KD  
R

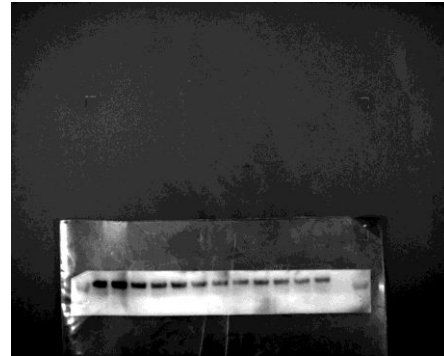

repeat2

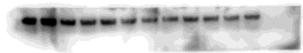

a-Tubulin (AF0001),  
R, 55KD

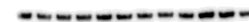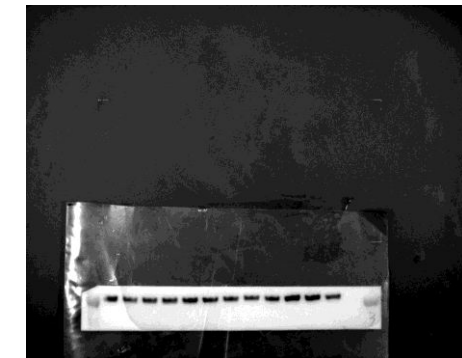

INHBA(ER1911-46)  
45KD  
R

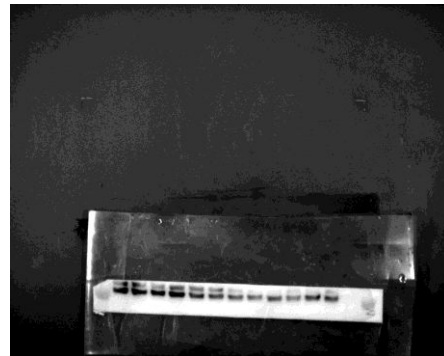

repeat3

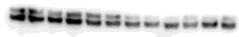

a-Tubulin (AF0001),  
R, 55KD

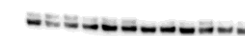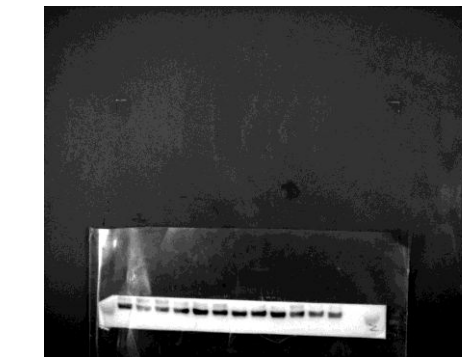

cropped

INHBA(A5232)  
45KD  
R

repeat1

GAPDH (6004-1-Ig)  
37KD  
M

INHBA(A5232)  
45KD  
R

repeat2

GAPDH (6004-1-Ig)  
37KD  
M

INHBA(A5232)  
45KD  
R

repeat3

$\alpha$ -Tubulin (AF0001), R,  
55KD

sham-DMSO    sham-TAN I    UO- DMSO    UO-TAN I

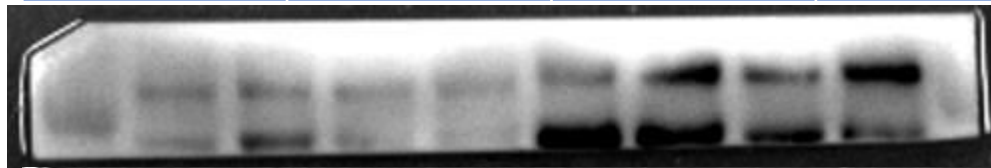

52kd

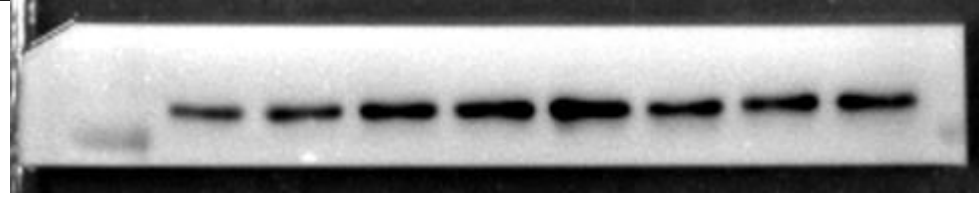

37kd

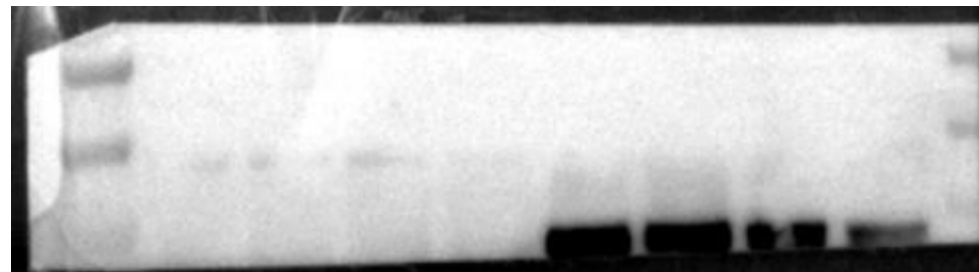

90kd

66kd

52kd

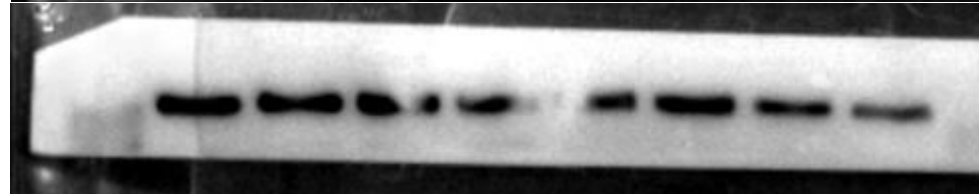

37kd

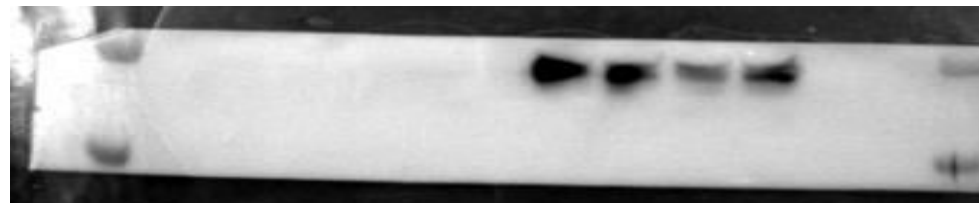

52kd

37kd

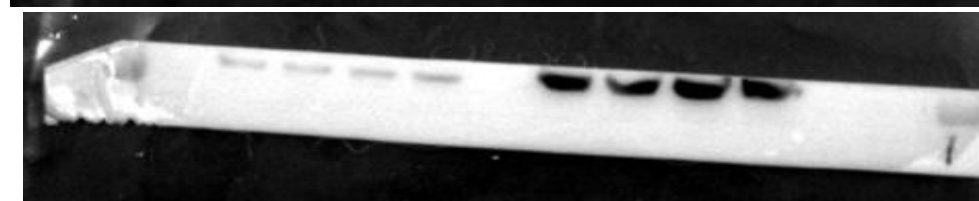

52kd

The expression of INHBA in sham or UO kidneys was analyzed by Western blotting and then quantified.

INHBA(A5232)

45KD

R

repeat1

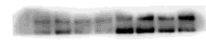

original

merged

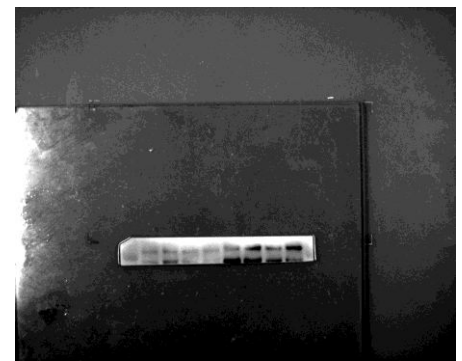

GAPDH (6004-1-Ig) ,  
37KD, M

original

merged

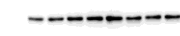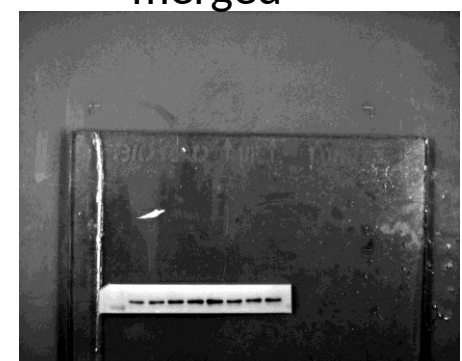

INHBA(A5232)

45KD

R

repeat2

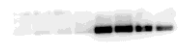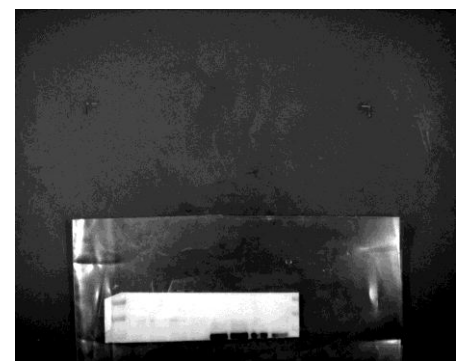

GAPDH (6004-1-Ig) ,  
37KD, M

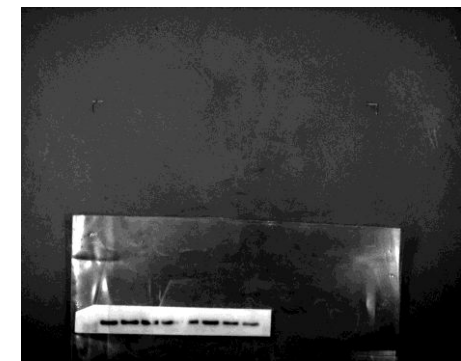

INHBA(A5232)

45KD

R

repeat3

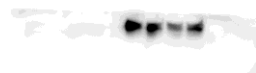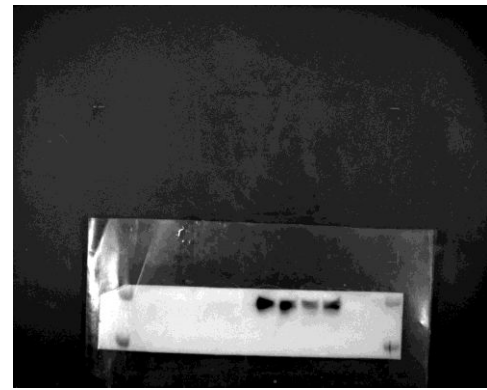

a-Tubulin (AF0001),  
R, 55KD

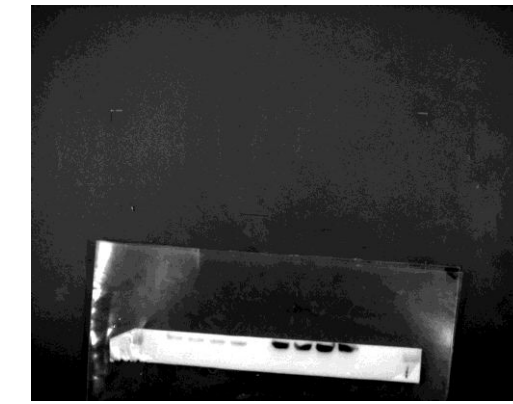

cropped

| Mk | Ns-dms | Ns-dms | Ns-dms | Aan-dms | Aan-dms | Aan-dms | Aan-dms | Aan-dms | Aan-Tan- | Aan-Tan- | Aan-Tan- | Aan-Tan- | Aan-Tan- | mk |
|----|--------|--------|--------|---------|---------|---------|---------|---------|----------|----------|----------|----------|----------|----|
|    | o      | o      | o      | o       | o       | o       | o       | o       |          |          |          |          |          |    |

The expression of INHBA in NS or AAN kidneys was analyzed by Western blotting and then quantified.

INHBA(A5232)  
45KD  
R

repeat1

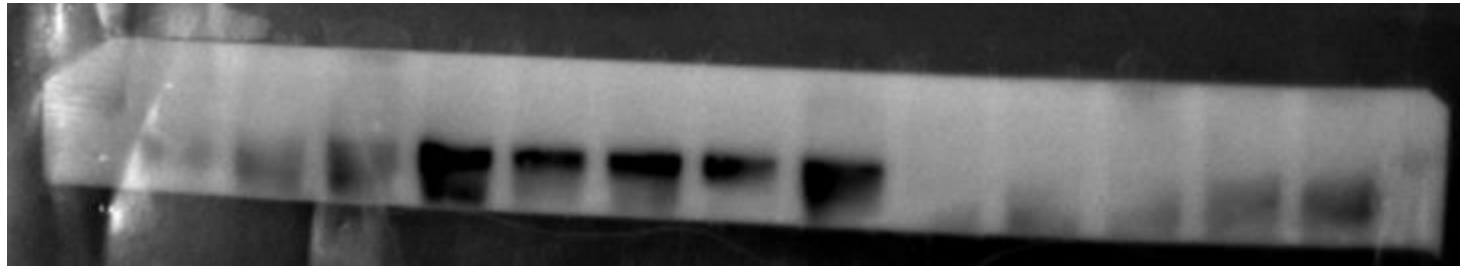

52kd

GAPDH (6004-1-Ig)  
37KD  
M

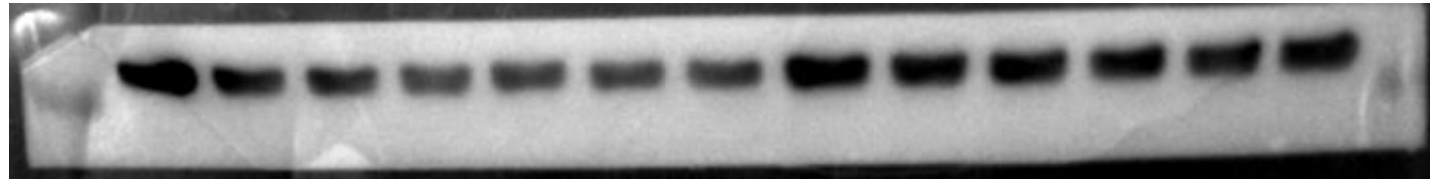

37kd

INHBA(ER1911-46)  
45KD  
R

repeat2

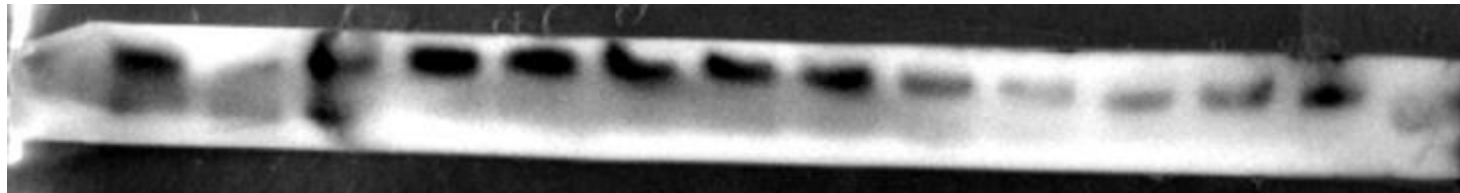

52kd

GAPDH (6004-1-Ig)  
37KD  
M

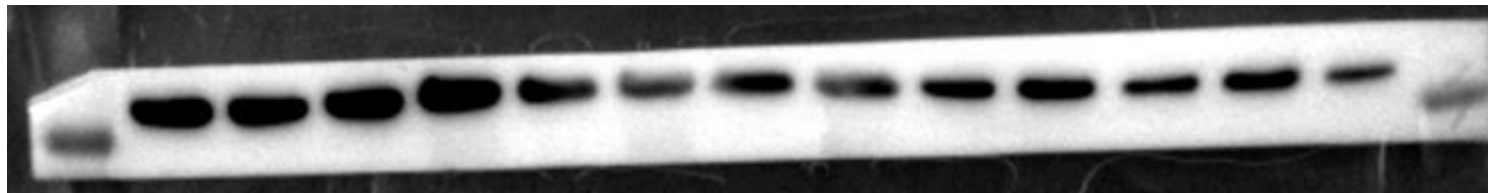

37kd

INHBA(ER1911-46)  
45KD  
R

repeat3

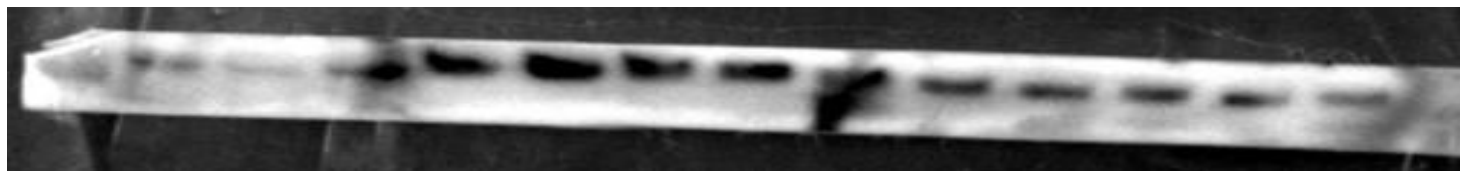

52kd

GAPDH (6004-1-Ig)  
37KD  
M

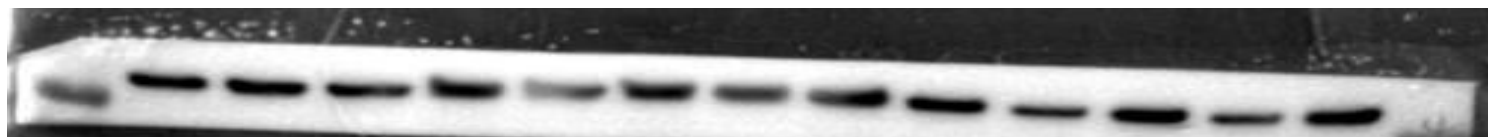

37kd



original

merged

GAPDH (6004-1-Ig) ,  
37KD, M

INHBA(A5232)  
45KD  
R  
repeat1

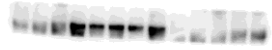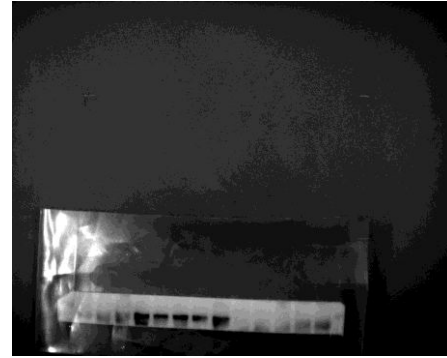

original

merged

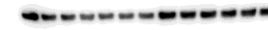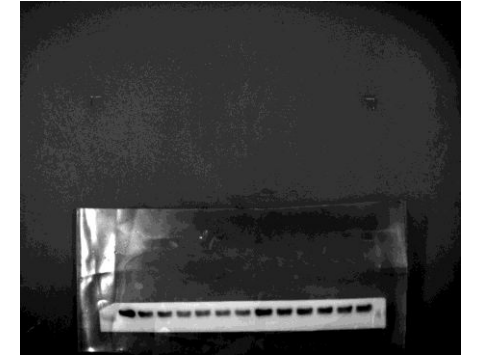

INHBA(A5232)  
45KD  
R  
repeat2

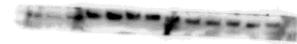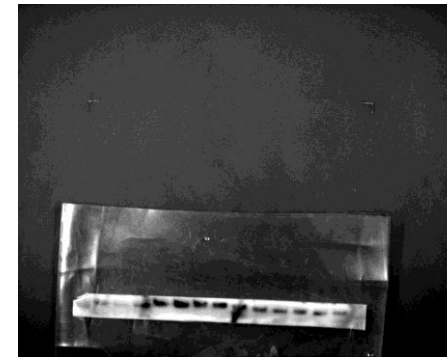

GAPDH (6004-1-Ig) ,  
37KD, M

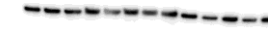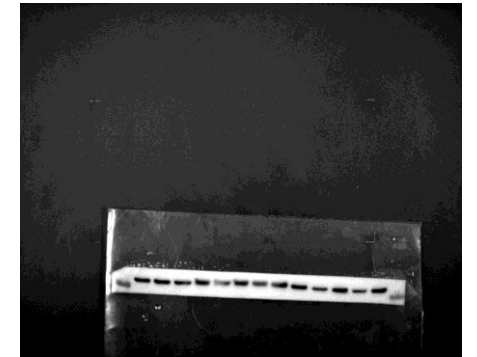

INHBA(A5232)  
45KD  
R  
repeat3

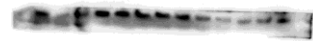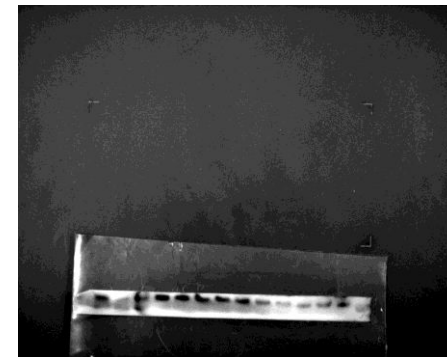

GAPDH (6004-1-Ig) ,  
37KD, M

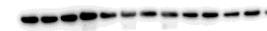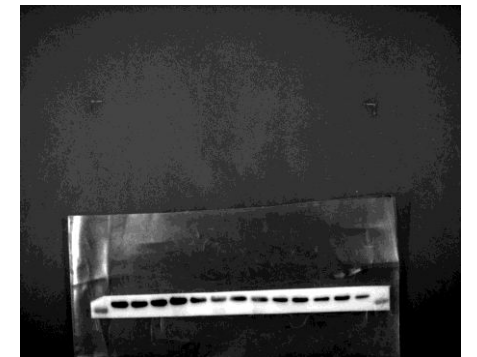

Supplement: 12906_2022_3592_MOESM4_ESM.pdf [file 12906_2022_3592_MOESM4_ESM.pdf]
