# Supplementary material for: Tanshinone I attenuates fibrosis in fibrotic kidneys through down-regulation of inhibin beta-A
Source: PubMed Central journal article supplement (PMC9020026; doi:10.1186/s12906-022-03592-3), 2022-04-19

Repeat1

cropped

| mk | nc | nc | nc | siR<br>NA | siR<br>NA | siR<br>NA |
|----|----|----|----|-----------|-----------|-----------|
|    |    |    |    |           |           |           |

Fn (ab23750)  
270kd  
R

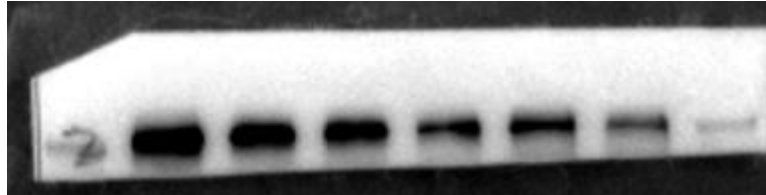

270kd

INHBA(A5232)  
45KD  
R

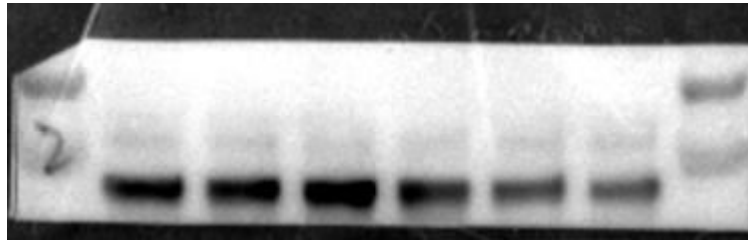

66kd

52kd

Snail (A11794)  
34KD  
R

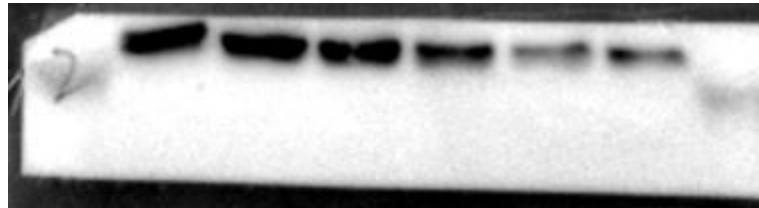

30kd

GAPDH (6004-  
1-Ig)  
37KD  
M

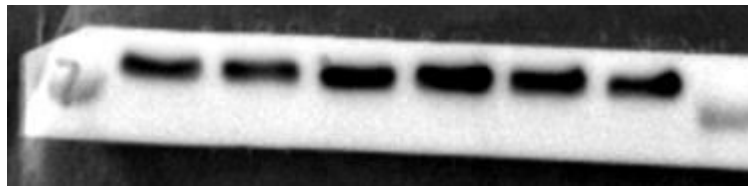

37kd

NRK-49F cells were transfected with nonsense control (NC) or INHBA siRNA (siINHBA). After 24h, cell lysates were collected and Western blot analysis was performed to measure the expression of INHBA, FN and Snail.

Fn (ab23750)  
270kd  
R

original

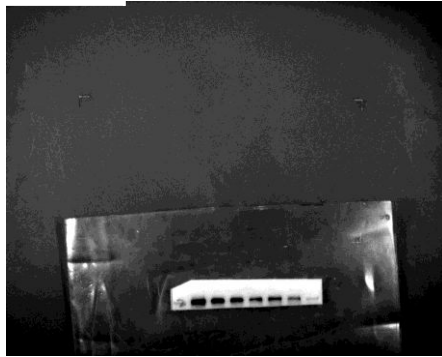

merged

GAPDH (6004-  
1-Ig)  
37KD  
M

original

merged

INHBA(A5232)  
45KD  
R

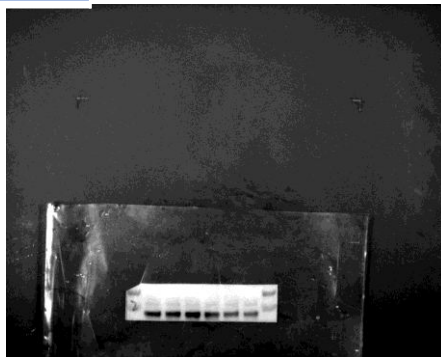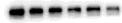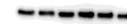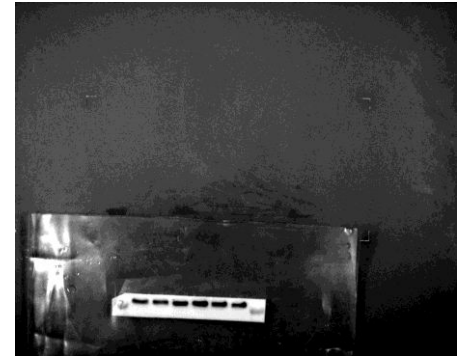

Snail (A11794)  
34KD  
R

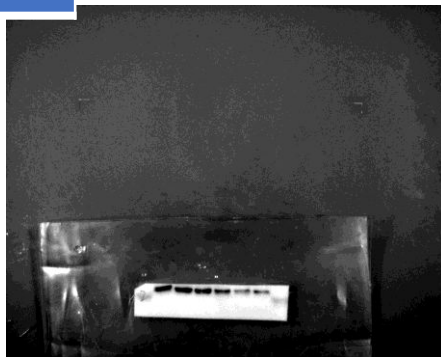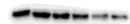

Repeat2

cropped

| mk | Nc | Nc | nc | siR<br>NA | siR<br>NA | siR<br>NA | mk |
|----|----|----|----|-----------|-----------|-----------|----|
|----|----|----|----|-----------|-----------|-----------|----|

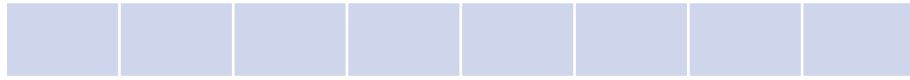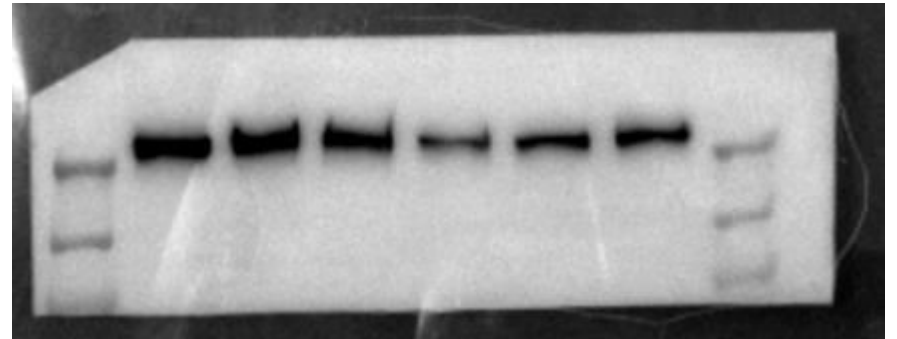

270kd  
170kd  
130kd

**Fn (ab23750)**  
270kd  
R

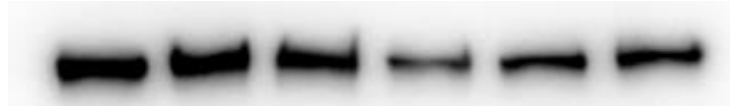

**INHBA(A5232)**  
45KD  
R

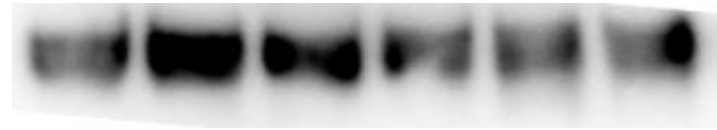

**Snail (A11794)**  
34KD  
R

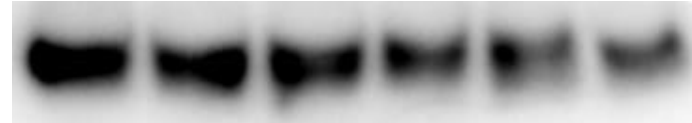

**GAPDH (6004-1-Ig)**  
37KD  
M

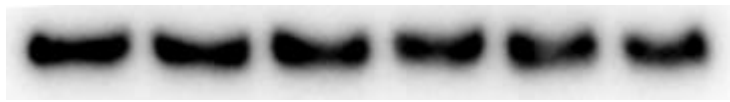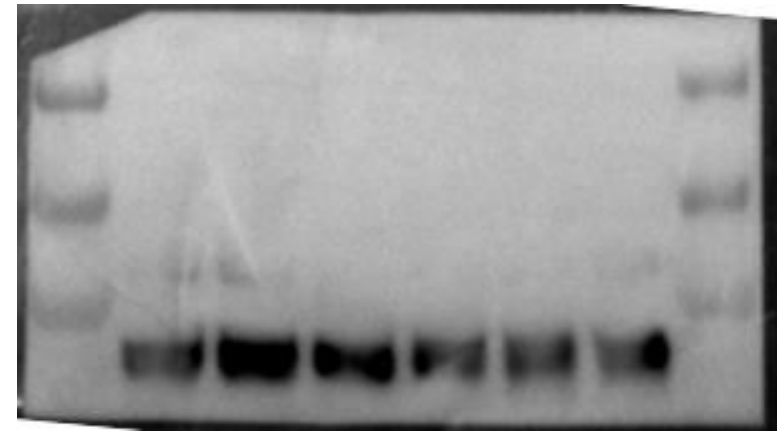

90kd  
66kd  
52kd

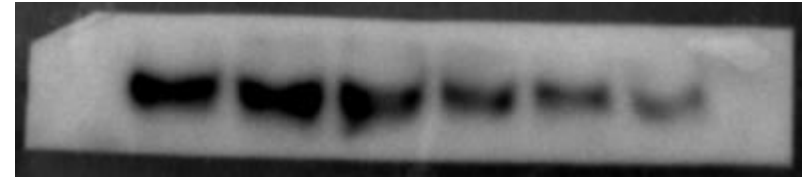

30kd

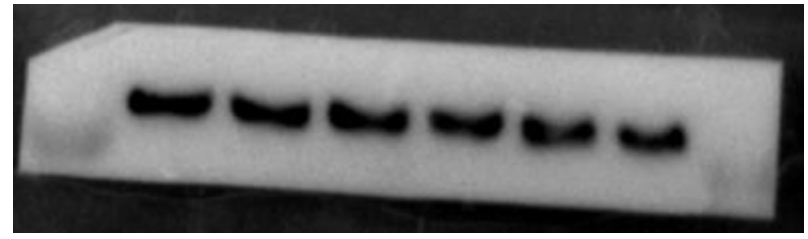

37kd

Fn (ab23750)  
270kd  
R

original

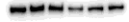

merged

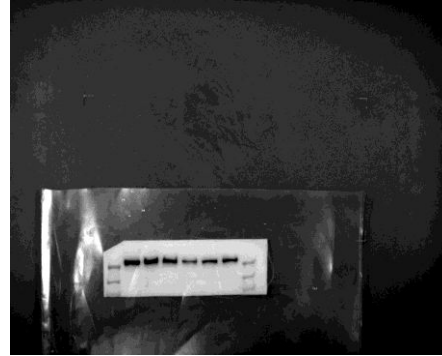

GAPDH (6004-  
1-Ig)  
37KD  
M

original

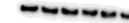

merged

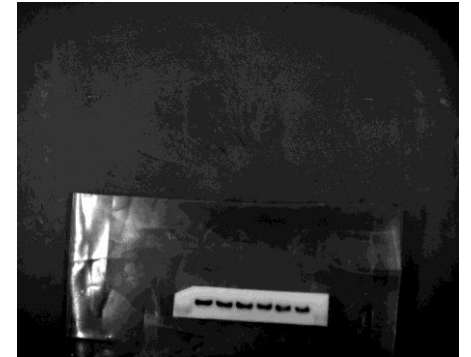

INHBA(A5232)  
45KD  
R

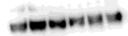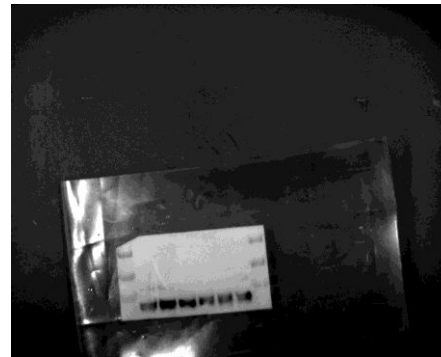

Snail (A11794)  
34KD  
R

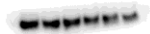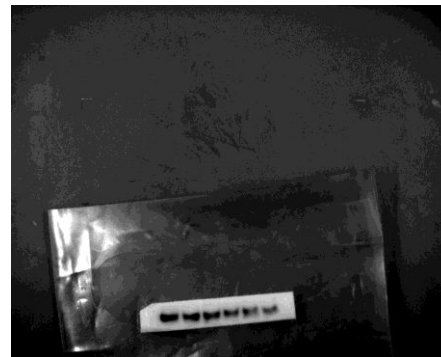

Repeat3

cropped

| mk | Nc | Nc | siR<br>NA | siR<br>NA |
|----|----|----|-----------|-----------|
|    |    |    |           |           |

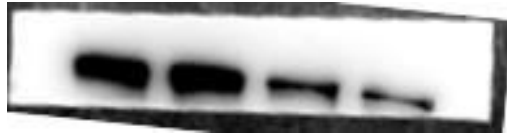

270kd

Fn (ab23750)  
270kd  
R

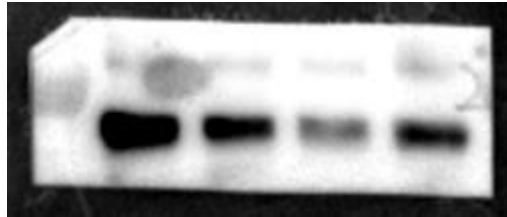

52kd

INHBA(A5232)  
45KD  
R

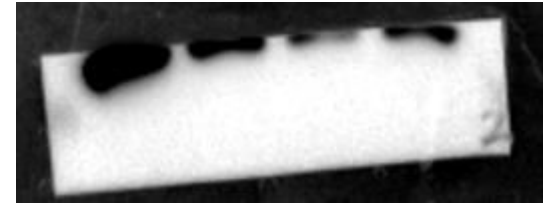

30kd

Snail (A11794)  
34KD  
R

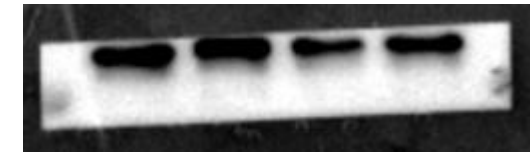

37kd

GAPDH (6004-  
1-Ig)  
37KD  
M

INHBA(A5232)  
45KD  
R

original

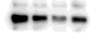

merged

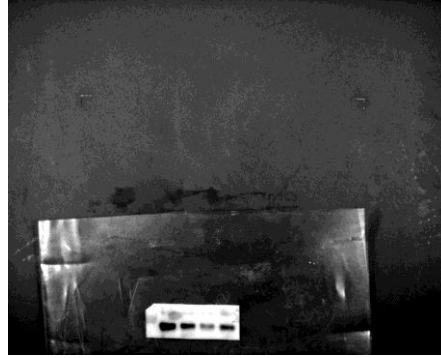

Fn (ab23750)  
270kd  
R

original

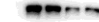

merged

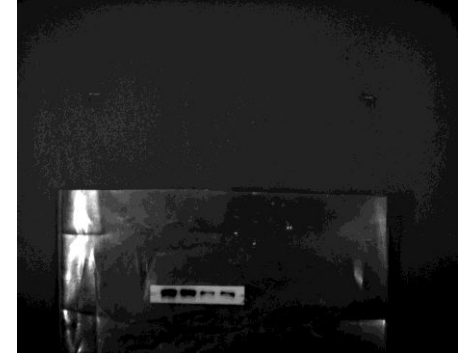

Snail (A11794)  
34KD  
R

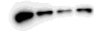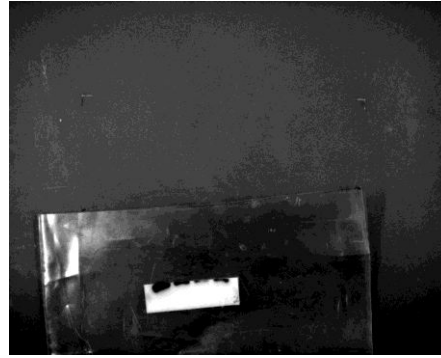

GAPDH (6004-  
1-Ig)  
37KD  
M

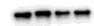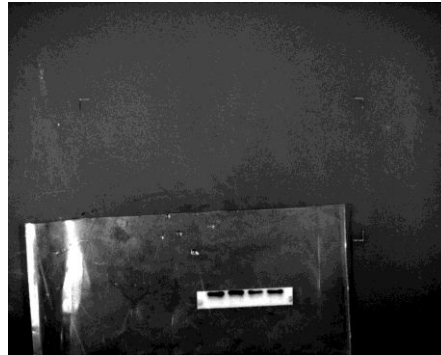

Repeat1  
cropped

| mk | Nc   |      |      | NC    |       |       | siRNA |      |      | siRNA |       |       | mk |
|----|------|------|------|-------|-------|-------|-------|------|------|-------|-------|-------|----|
|    | dms0 | dms0 | dms0 | Tan-I | Tan-I | Tan-I | dms0  | dms0 | dms0 | Tan-I | Tan-I | Tan-I |    |

Fn (ab23750)  
270kd  
R

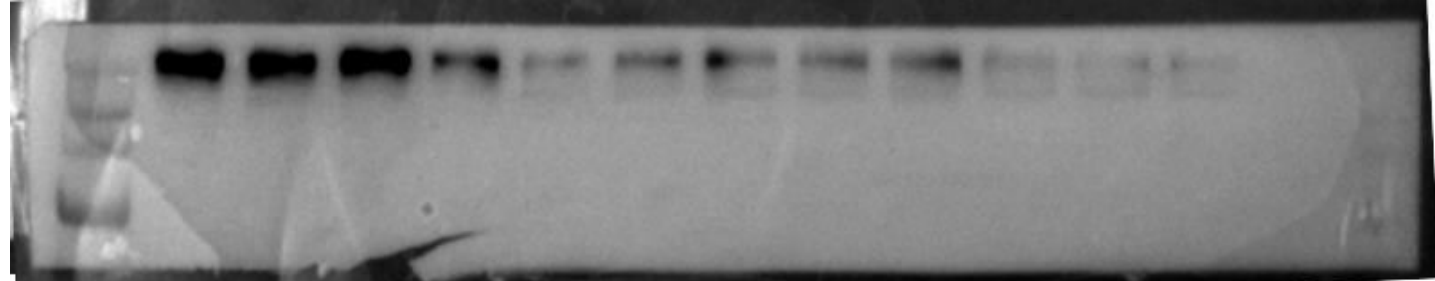

270kd  
170kd  
130kd  
90kd

INHBA(A5232)  
45KD  
R

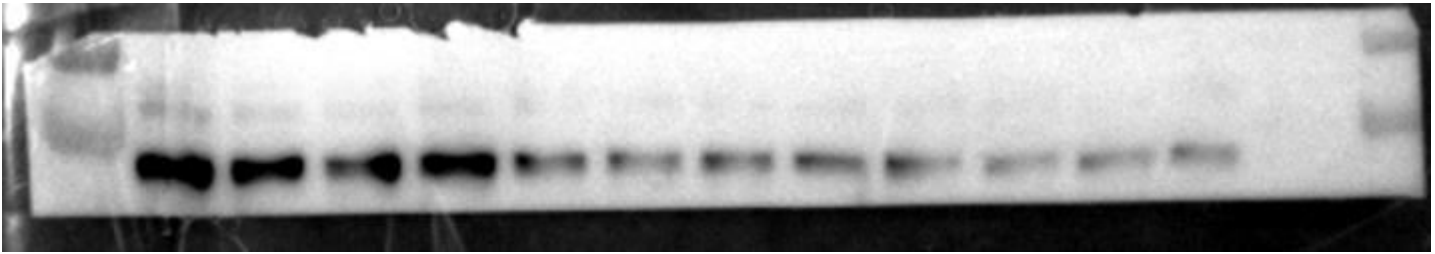

66kd  
52kd

GAPDH (6004-1-Ig)  
37KD  
M

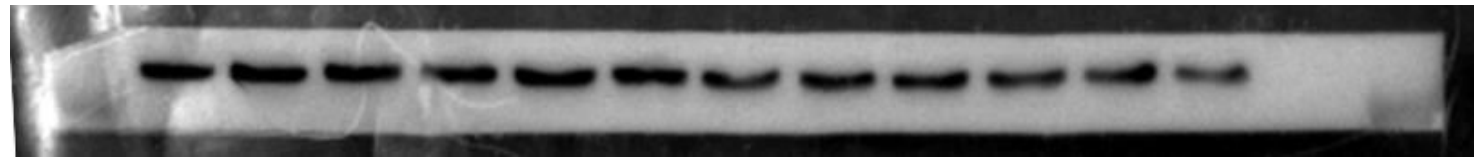

37kd

Snail (A11794)  
34KD  
R

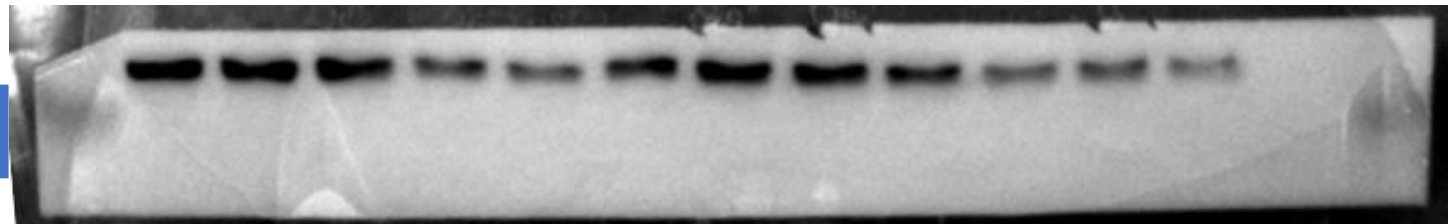

30kd

NRF-49F cells were transfected with NC or siINHBA. On the second day, cells were treated 50  $\mu$ M of Tan-I for another 24h. Cell lysates were collected and Western blot analysis was performed to measure the expression of INHBA, FN and Snail.



Fn (ab23750)  
270kd  
R

original

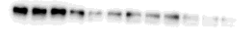

merged

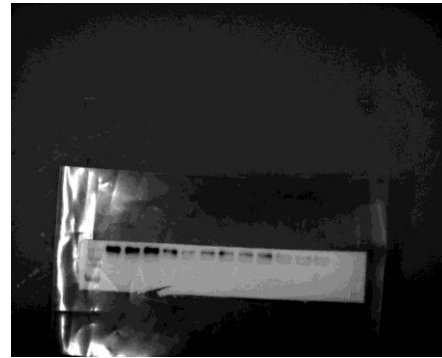

INHBA(A5232)  
45KD  
R

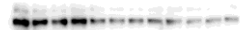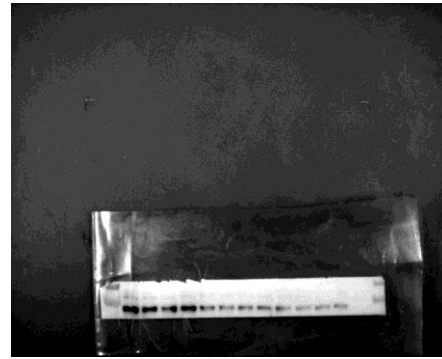

Snail (A11794)  
34KD  
R

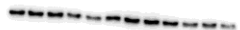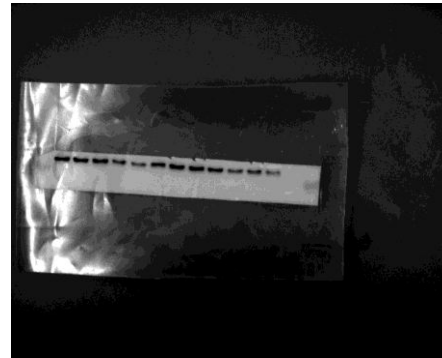

GAPDH (6004-1-Ig)  
37KD  
M

original

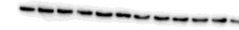

merged

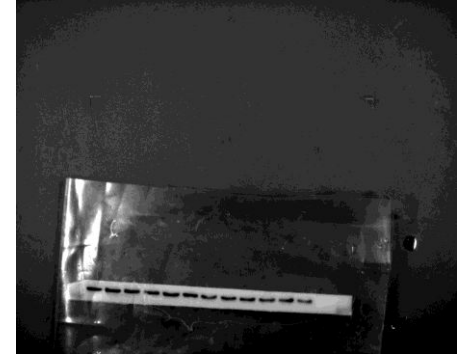



Repeat2

cropped

| mk | Nc   |      |      | NC    |       |       | siRNA |      |      | siRNA |       |       | mk |  |
|----|------|------|------|-------|-------|-------|-------|------|------|-------|-------|-------|----|--|
|    | dms0 | dms0 | dms0 | Tan-I | Tan-I | Tan-I | dms0  | dms0 | dms0 | Tan-I | Tan-I | Tan-I |    |  |

Fn (ab23750)  
270kd  
R

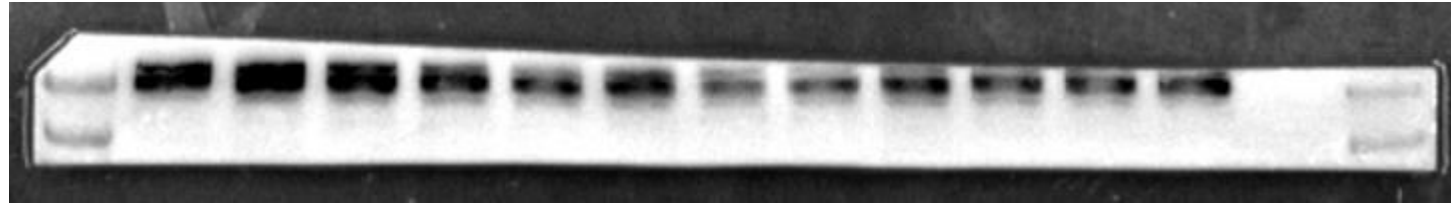

270kd

170kd

INHBA(A5232)  
45KD  
R

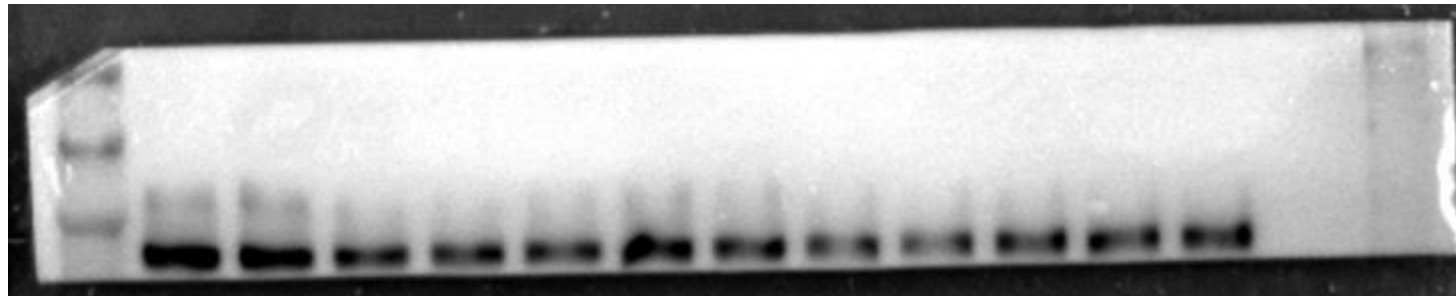

90kd

66kd

52kd

GAPDH (6004-1-Ig)  
37KD  
M

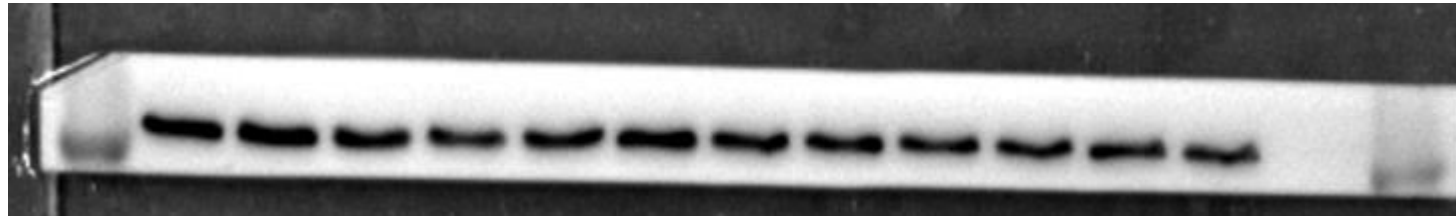

37kd

Snail (A11794)  
34KD  
R

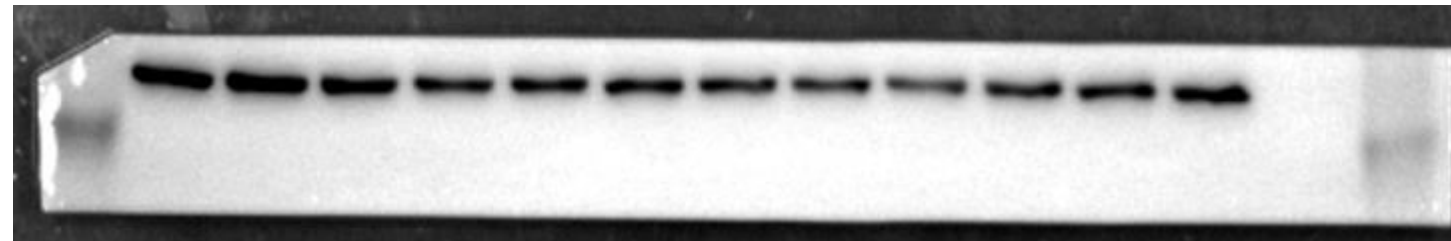

30kd

Fn (ab23750)  
270kd  
R

original

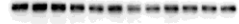

merged

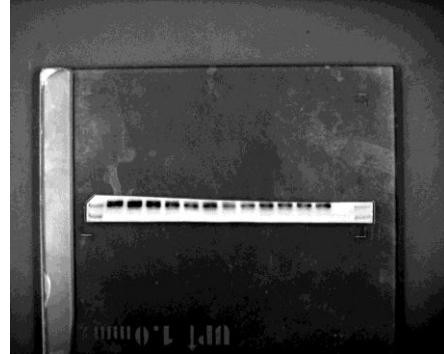

Snail (A11794)  
34KD  
R

original

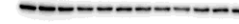

merged

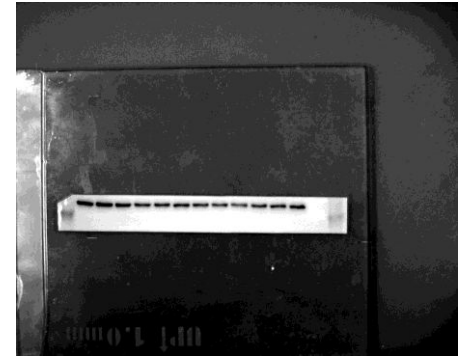

INHBA(A5232)  
45KD  
R

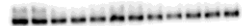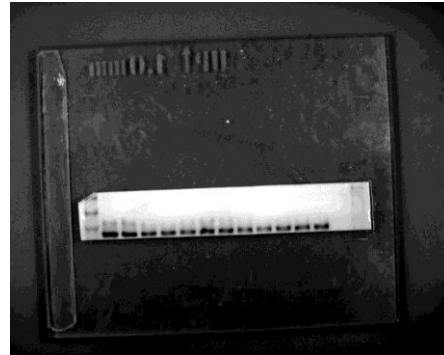

GAPDH (6004-1-Ig)  
37KD  
M

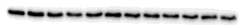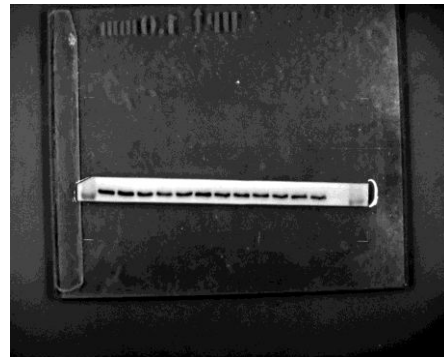

Repeat3

cropped

| mk | Nc   |      |      | NC    |       |       | siRNA |      |      | siRNA |       |       |  | mk |
|----|------|------|------|-------|-------|-------|-------|------|------|-------|-------|-------|--|----|
|    | dms0 | dms0 | dms0 | Tan-I | Tan-I | Tan-I | dms0  | dms0 | dms0 | Tan-I | Tan-I | Tan-I |  |    |

Fn (ab23750)  
270kd  
R

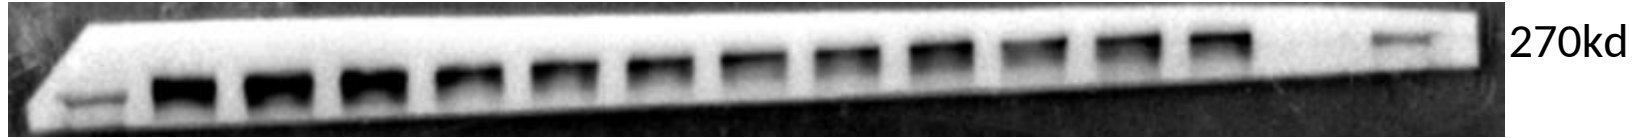

INHBA(A5232)  
45KD  
R

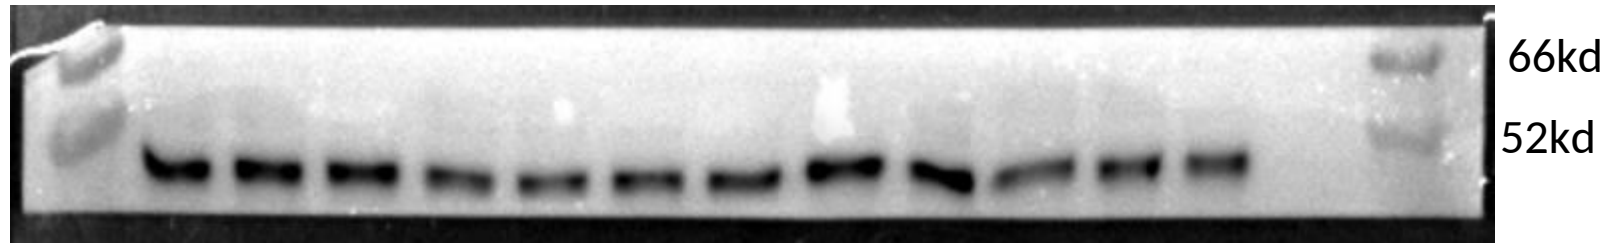

Snail (A11794)  
34KD  
R

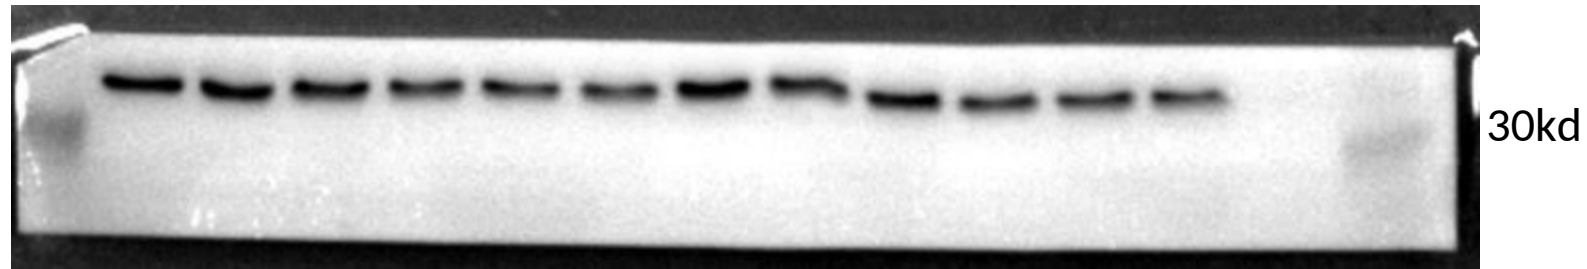

GAPDH (6004-1-Ig)  
37KD  
M

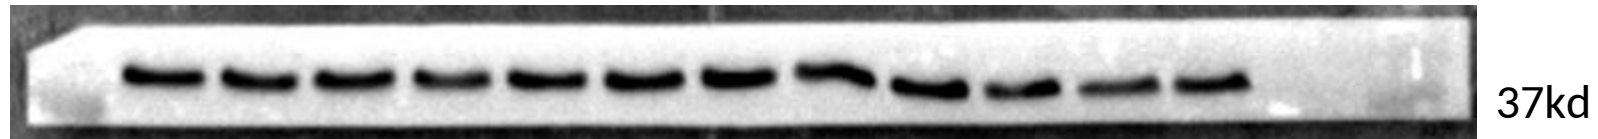

Fn (ab23750)  
270kd  
R

original

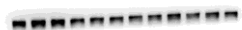

merged

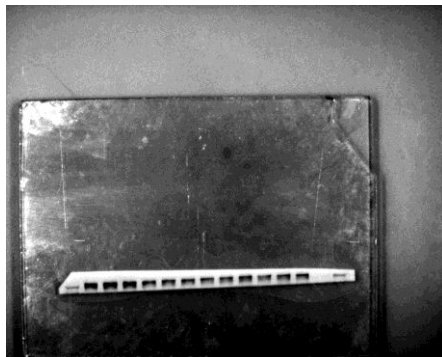

INHBA(A5232)  
45KD  
R

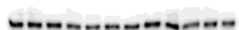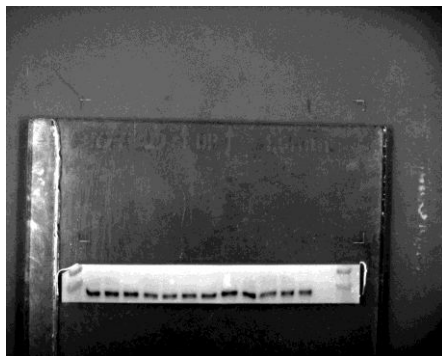

Snail (A11794)  
34KD  
R

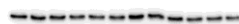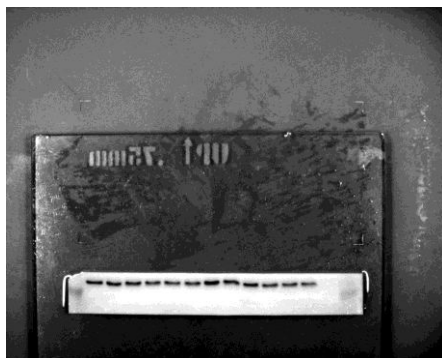

GAPDH (6004-1-Ig)  
37KD  
M

original

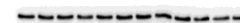

merged

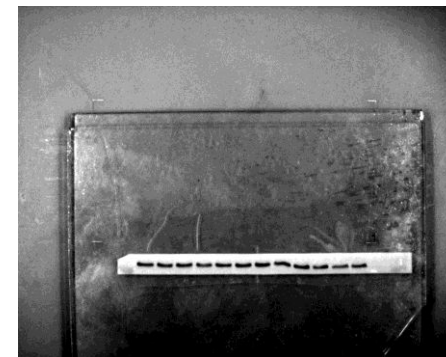

Supplement: 12906_2022_3592_MOESM5_ESM.pdf [file 12906_2022_3592_MOESM5_ESM.pdf]
